# Supplementary material for: Phenotypic and Genomic Diversification in Complex Carbohydrate-Degrading Human Gut Bacteria
Source: PubMed Central journal article supplement (PMC8845570; doi:10.1128/msystems.00947-21), 2022-02-15

## Supplemental Figure 7. Bacteroides LGT Loci

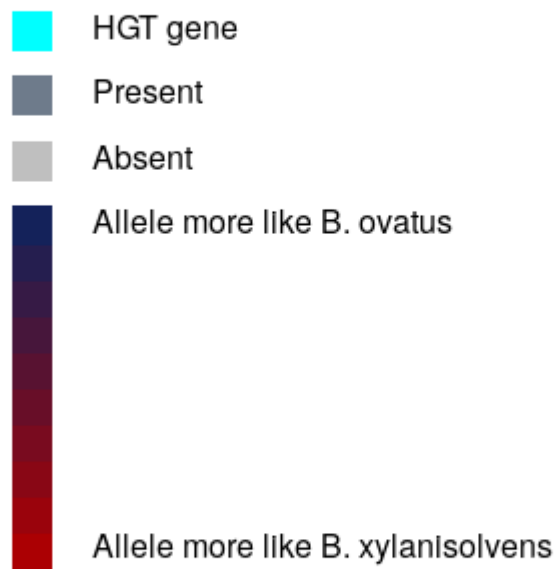

# PUL LGT Events

**B. ovatus PUL LGT Event 1**

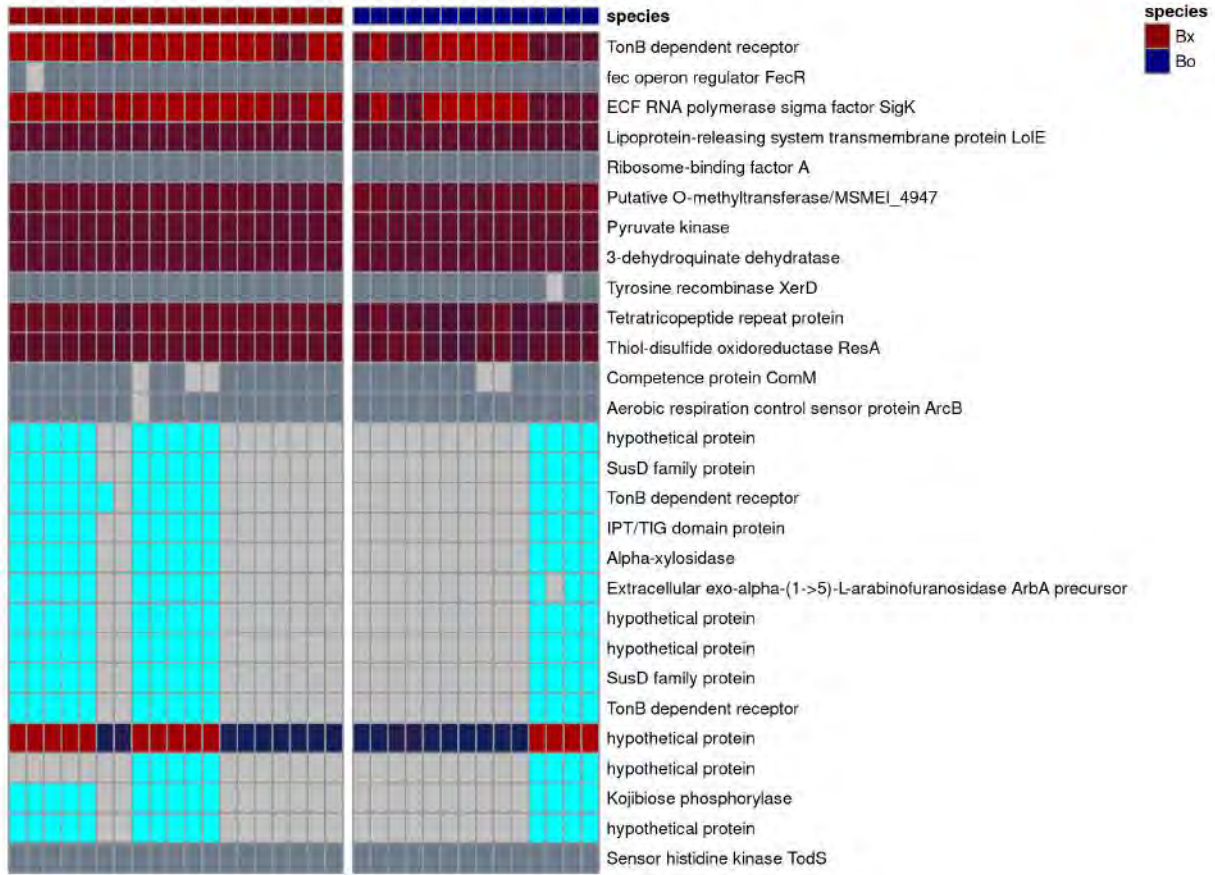

- Bovatus\_NLAE-zl-H361
- Bovatus\_NLAE-zl-H304
- Bacteroides\_ovatus\_SD\_CMC\_3f
- Bacteroides\_3\_1\_23
- Bacteroides\_ovatus\_3\_8\_47FAA
- Bovatus\_CL02T12C04
- Bacteroides\_ovatus\_ATCC\_8483
- Bovatus\_NLAE-zl-H73
- Bovatus\_NLAE-zl-H59
- Bacteroides\_ovatus\_CL03T12C18
- Bovatus\_NLAE-zl-C34
- Bovatus\_NLAE-zl-C11
- Bacteroides\_D2
- Bacteroides\_2\_2\_4
- Bxylanisolvans\_NLAE-zl-C339
- Bxylanisolvans\_NLAE-zl-C182
- Bxylanisolvans\_NLAE-zl-G421
- Bxylanisolvans\_NLAE-zl-G310
- Bxylanisolvans\_NLAE-zl-H194
- Bxylanisolvans\_NLAE-zl-C29
- Bacteroides\_D22
- Bacteroides\_xylanisolvans\_SD\_CC\_1b
- Bacteroides\_ovatus\_SD\_CC\_2a
- Bacteroides\_D1
- Bacteroides\_2\_1\_22
- Bacteroides\_xylanisolvans\_XB1A
- Bacteroides\_1\_1\_30
- Bxylanisolvans\_CL03T12C04
- Bxylanisolvans\_NLAE-zl-P732
- Bxylanisolvans\_NLAE-zl-P352
- Bxylanisolvans\_NLAE-zl-P393
- Bxylanisolvans\_NLAE-zl-P736
- Bxylanisolvans\_NLAE-zl-P727

**B. ovatus PUL LGT Event 2**

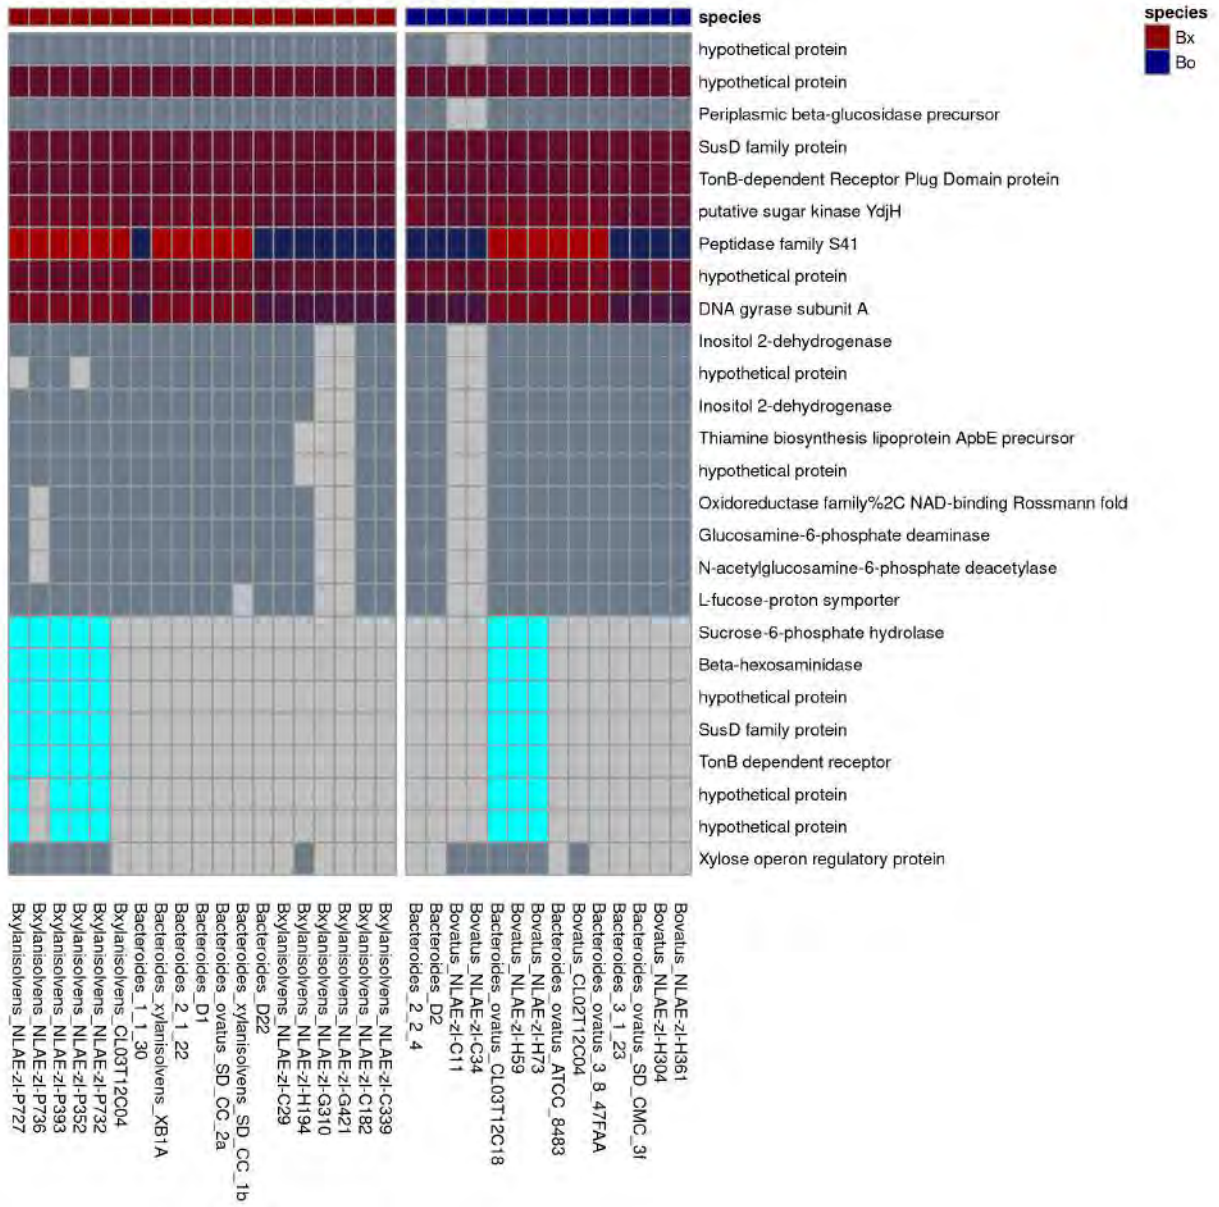

**B. ovatus PUL LGT Event 3**

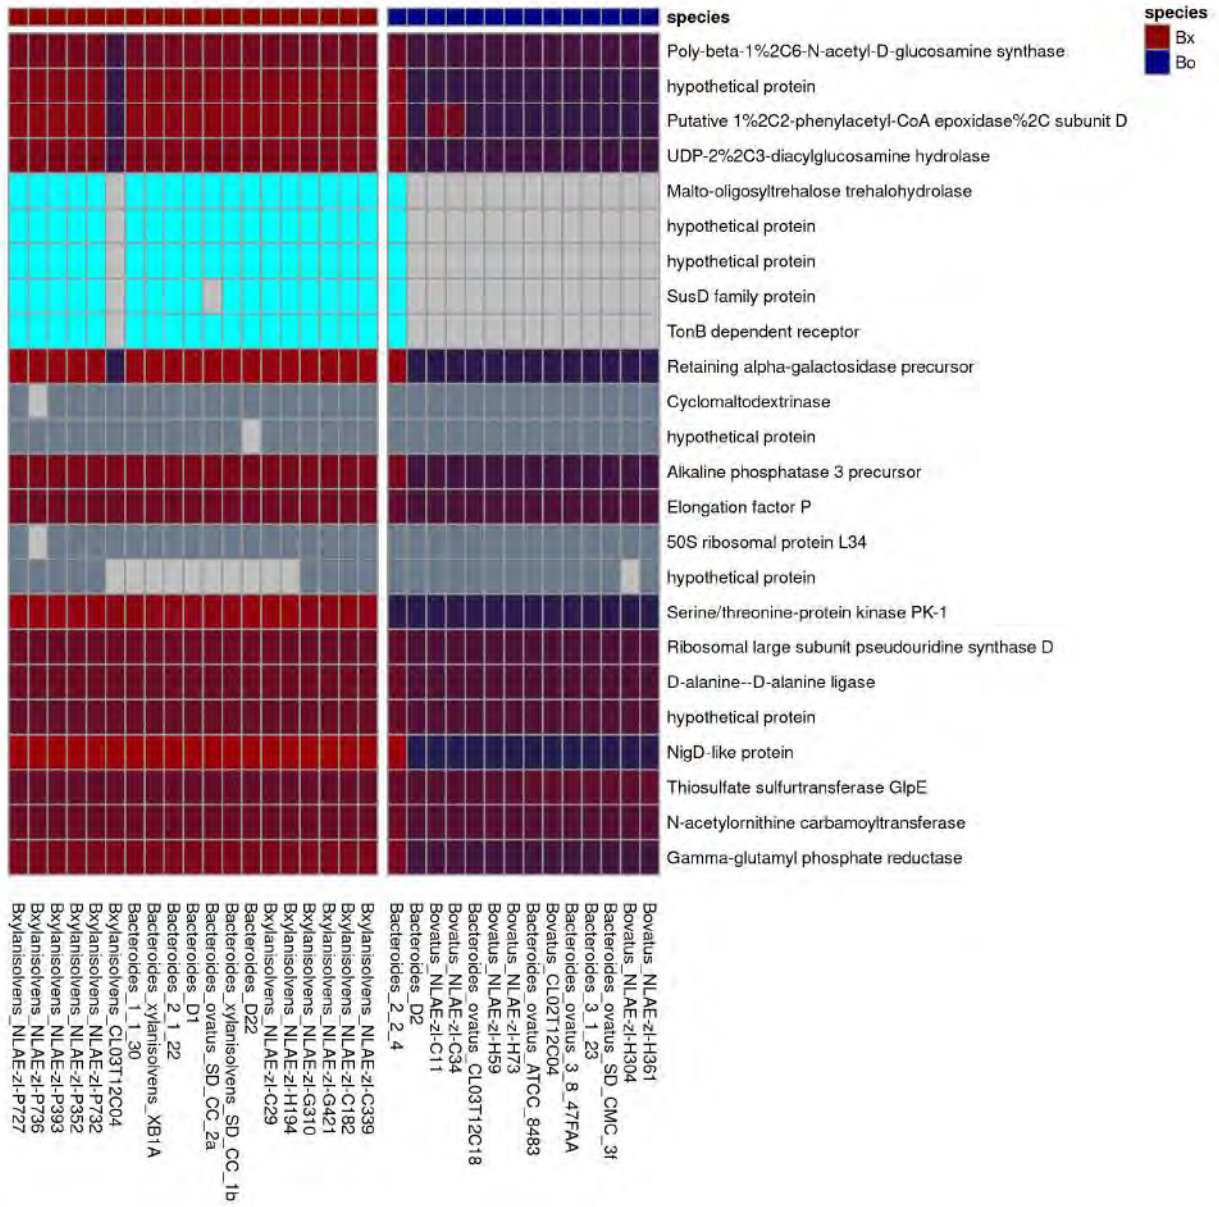



B. ovatus PUL LGT Event 4

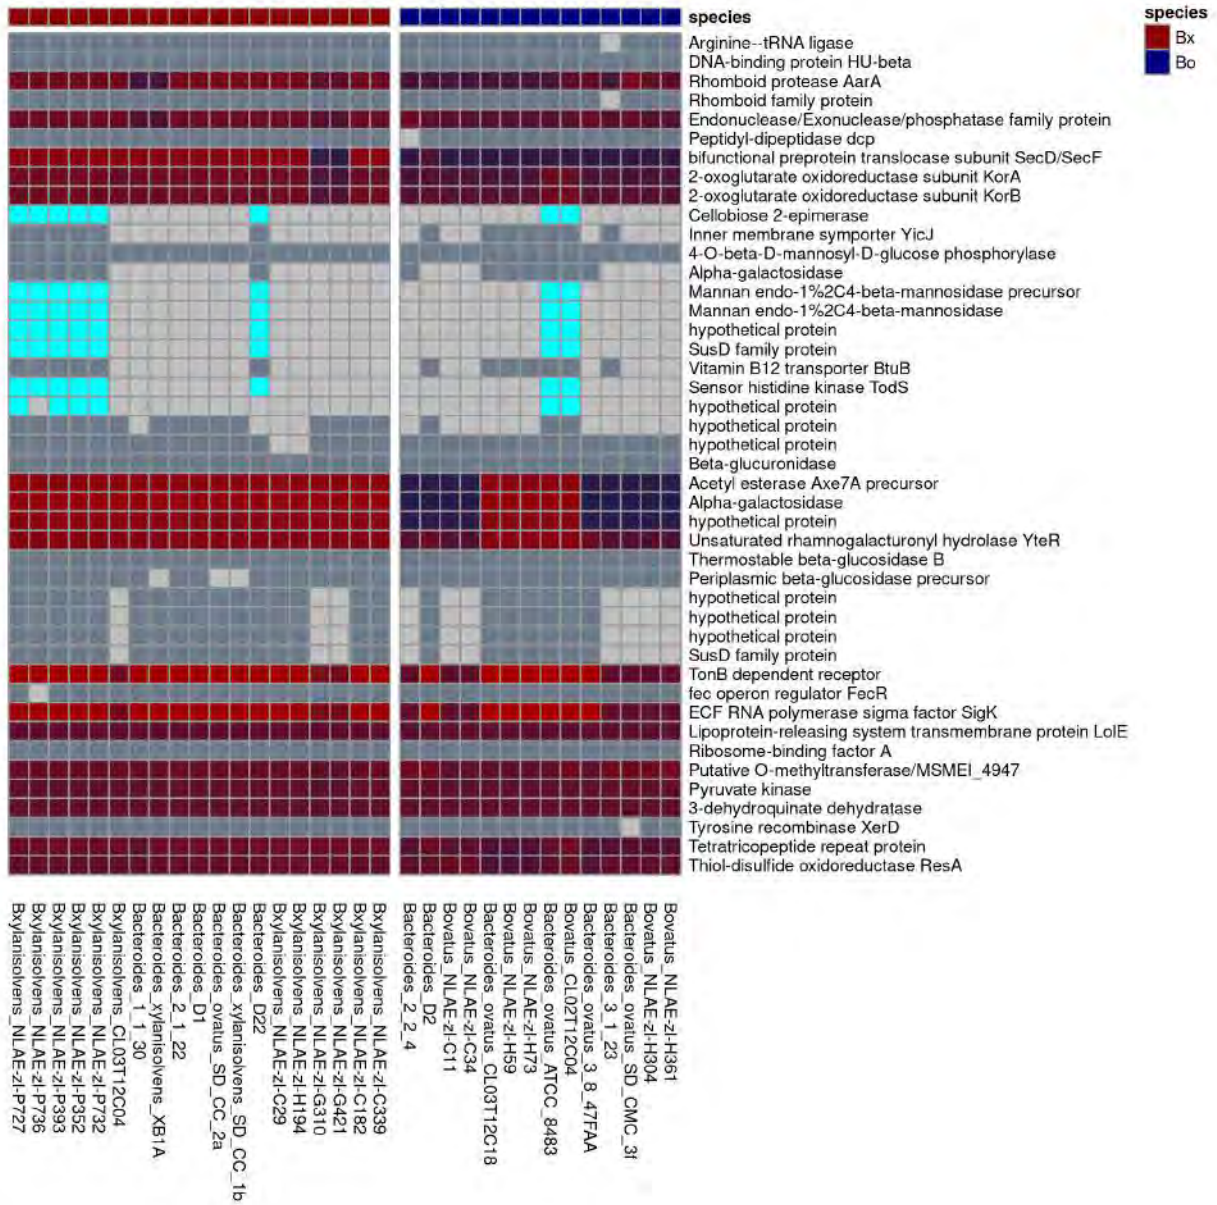

## B. xylanisolvans PUL LGT Event 1

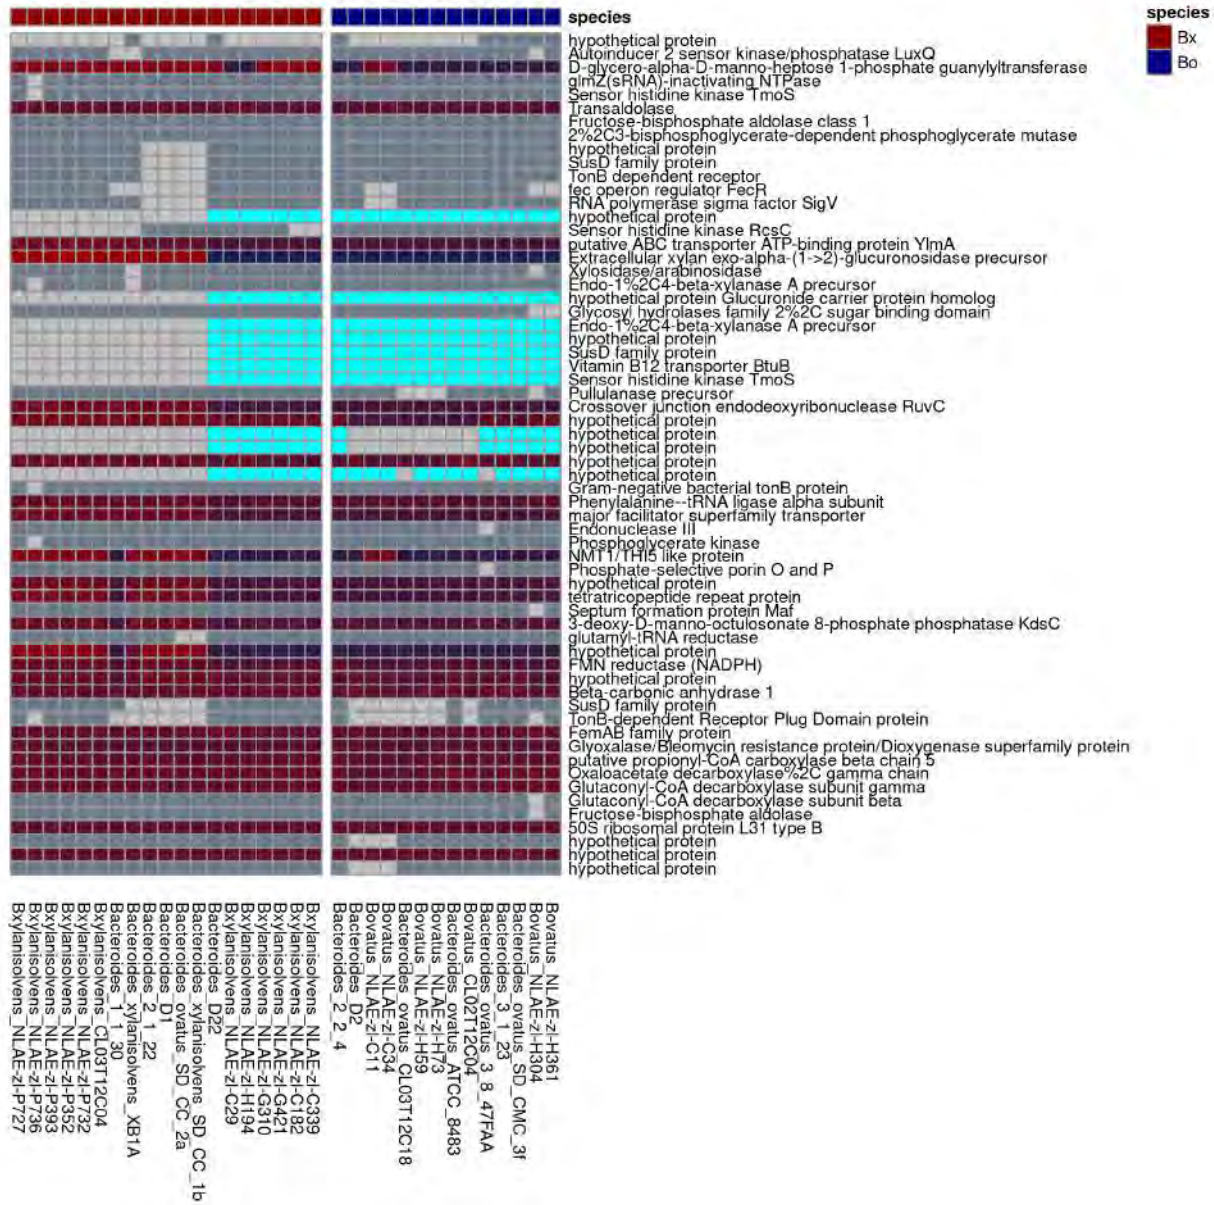



## B. xylanisolvans PUL LGT Event 2

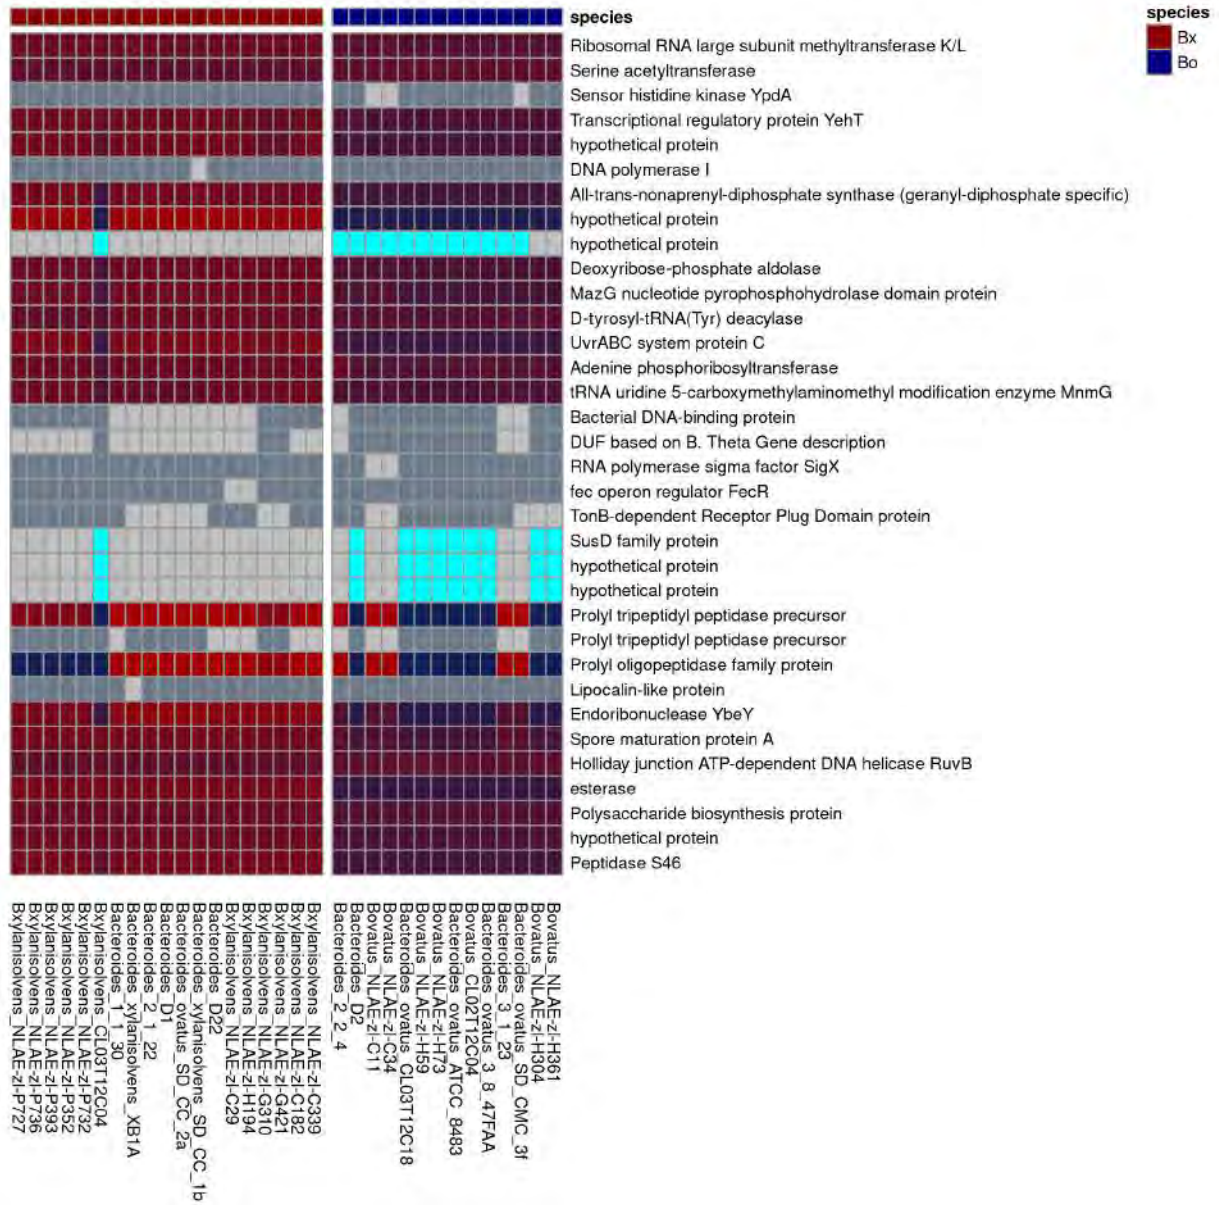





# non-PUL LGT Events

## B. ovatus non-PUL LGT Event 1

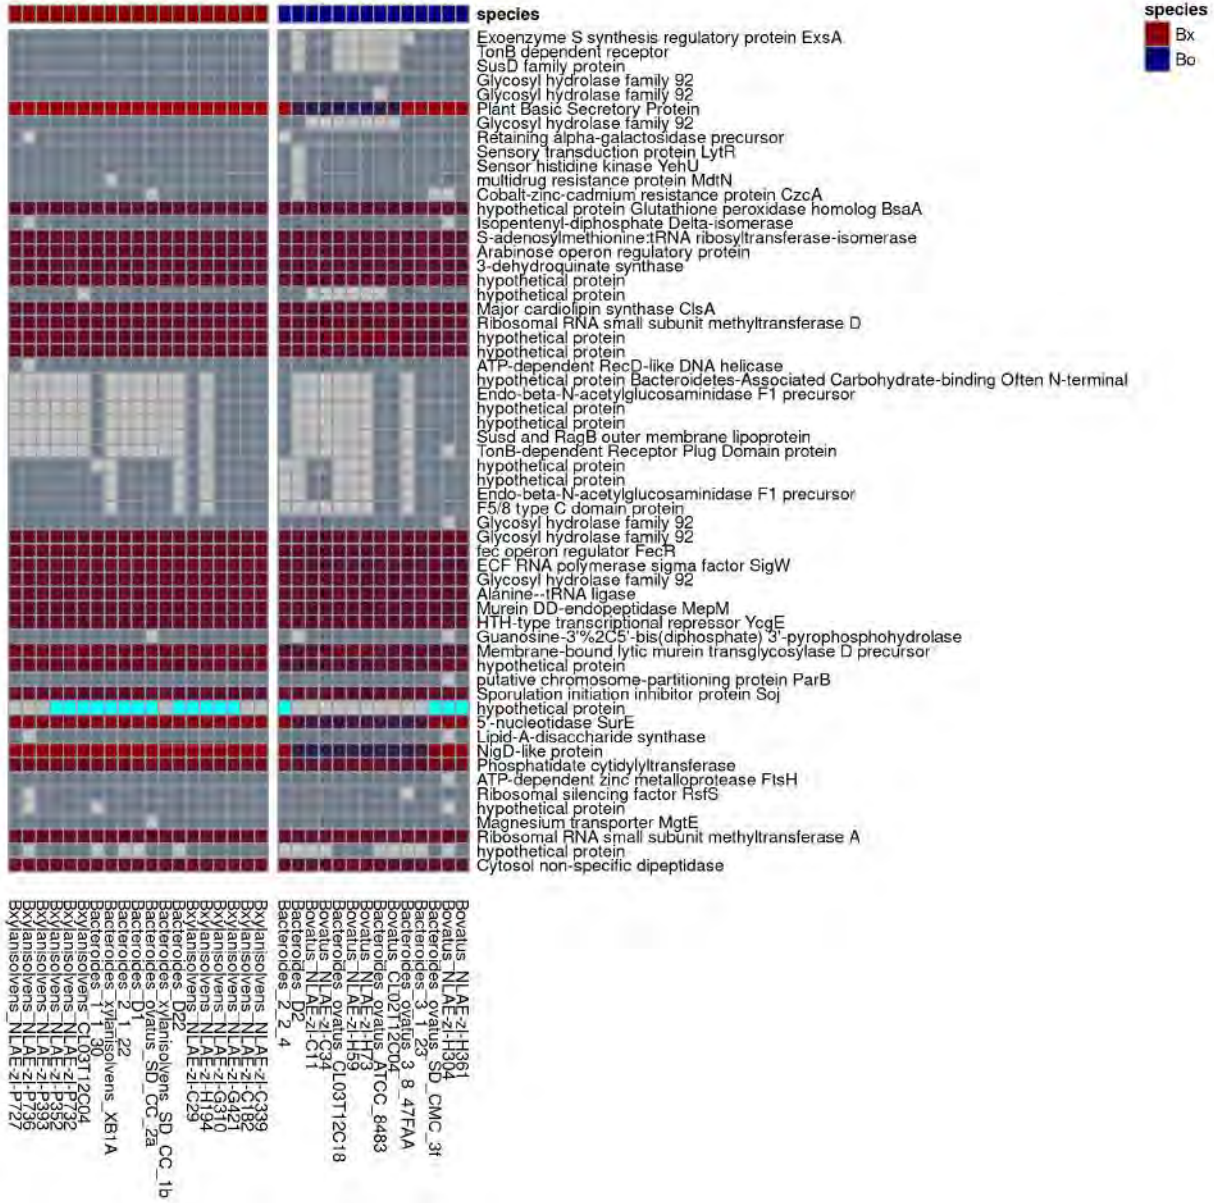

**B. ovatus non-PUL LGT Event 2**

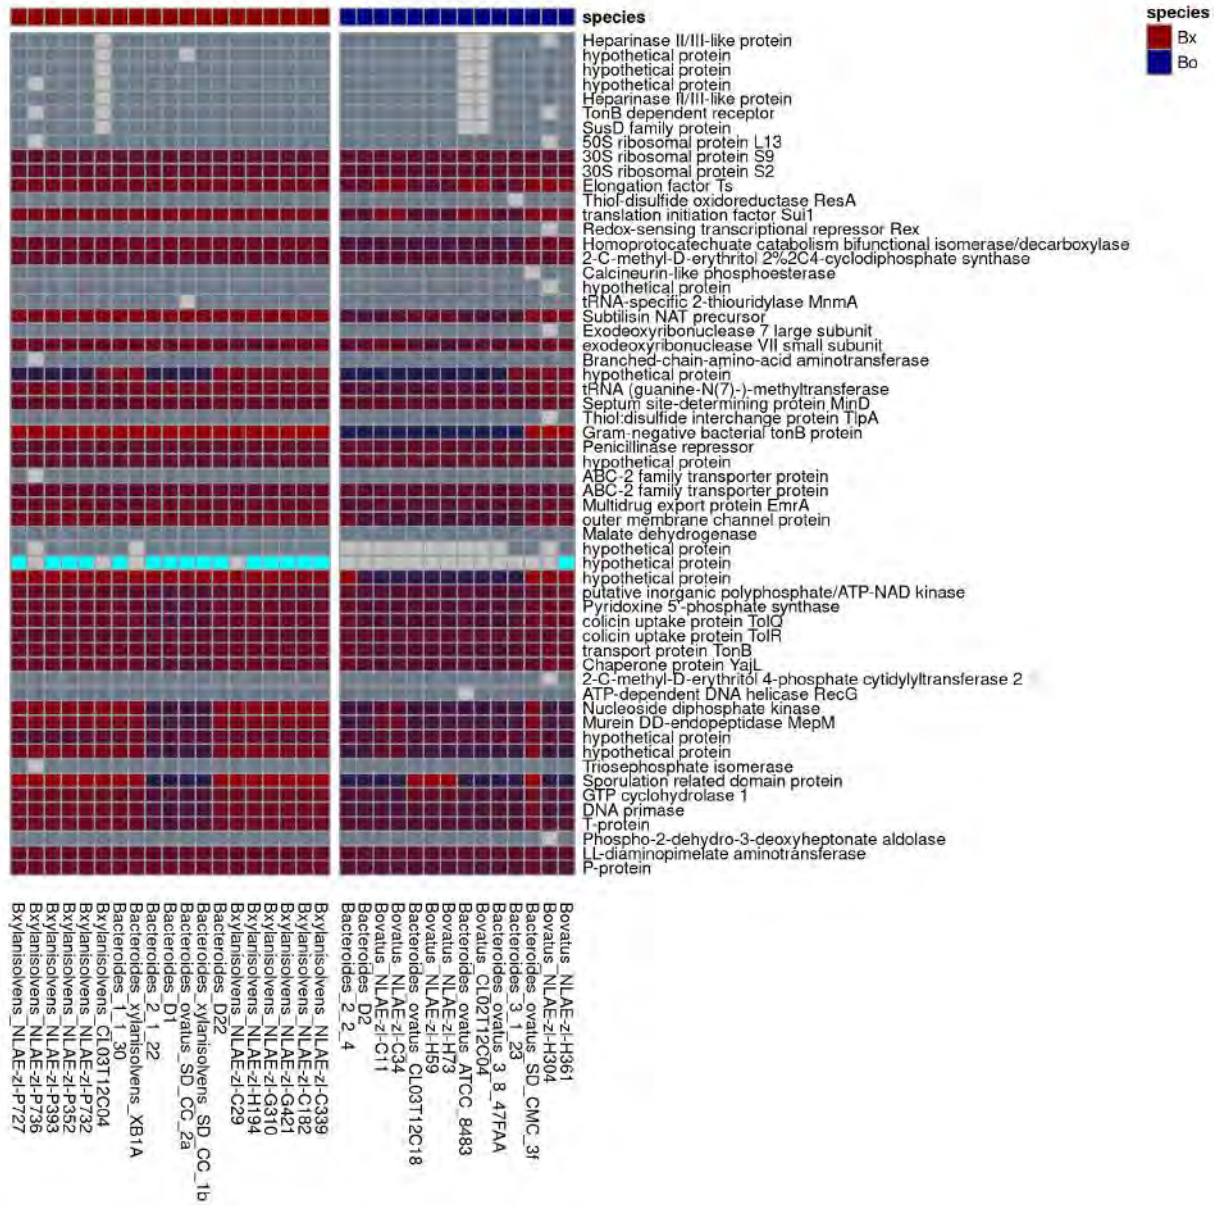







### B. ovatus non-PUL LGT Event 4

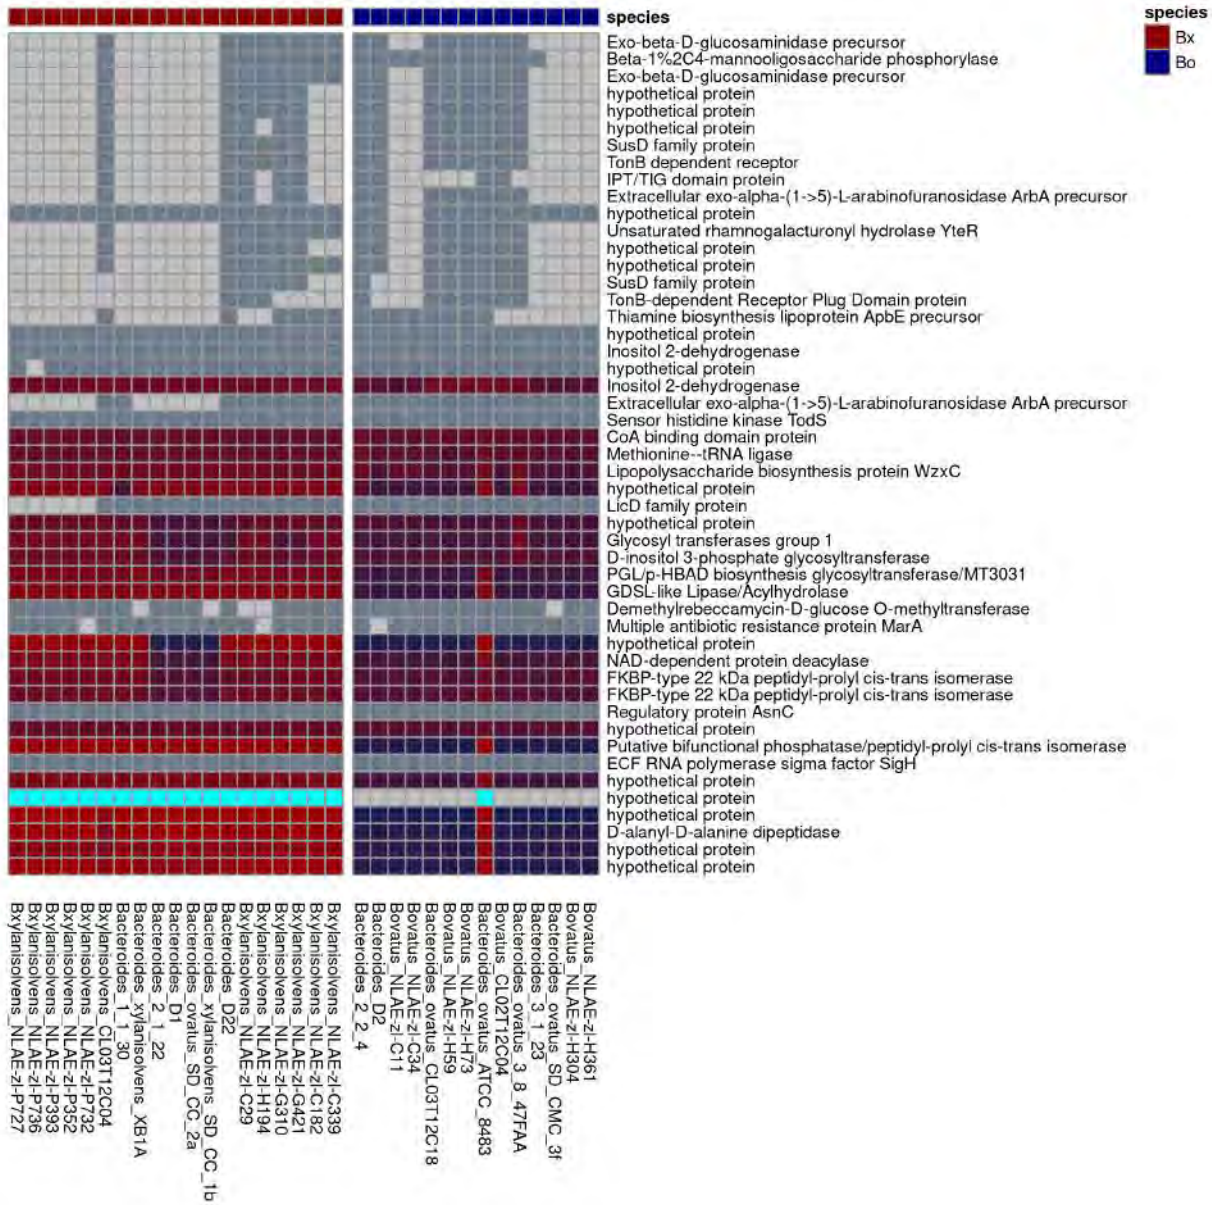

**B. ovatus non-PUL LGT Event 5**

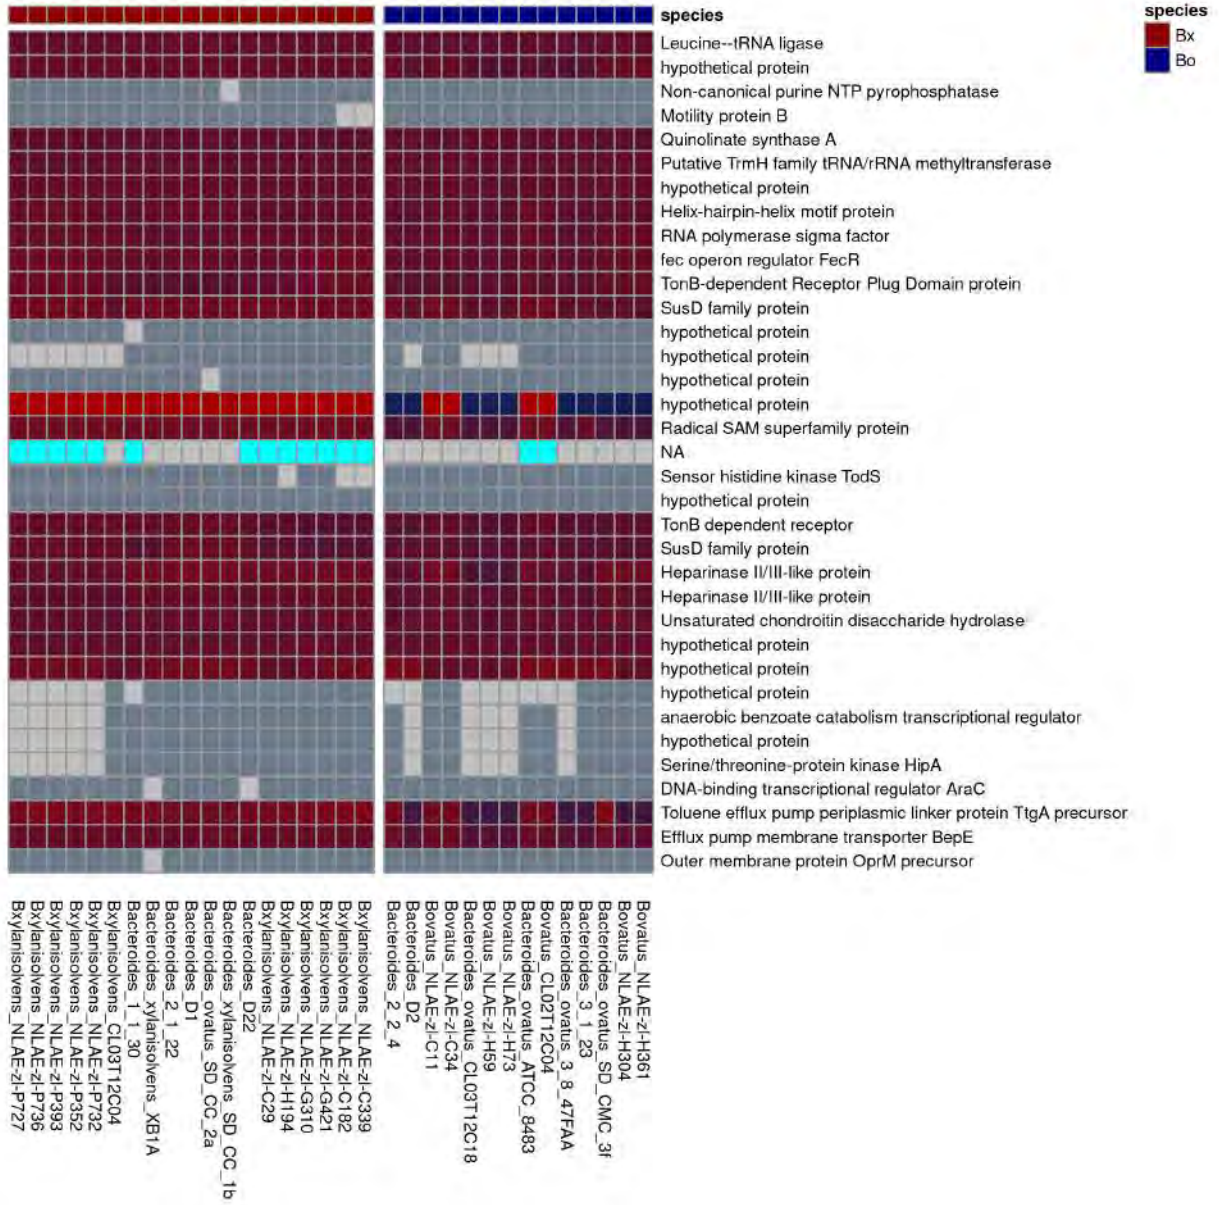



**B. ovatus non-PUL LGT Event 6**

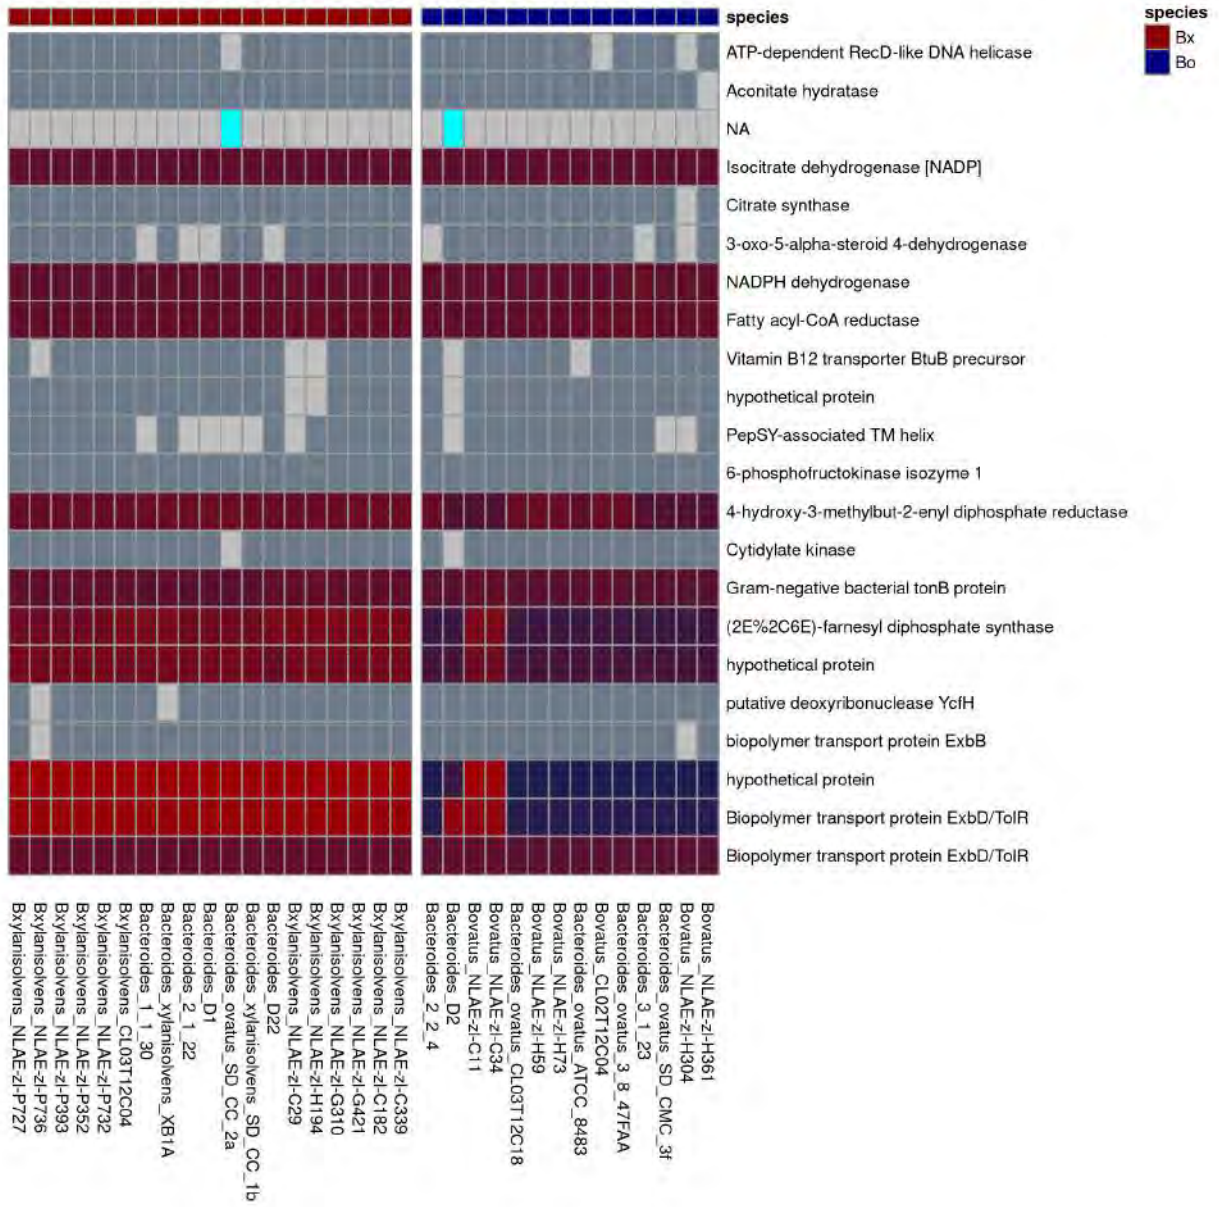



**B. ovatus non-PUL LGT Event 7**

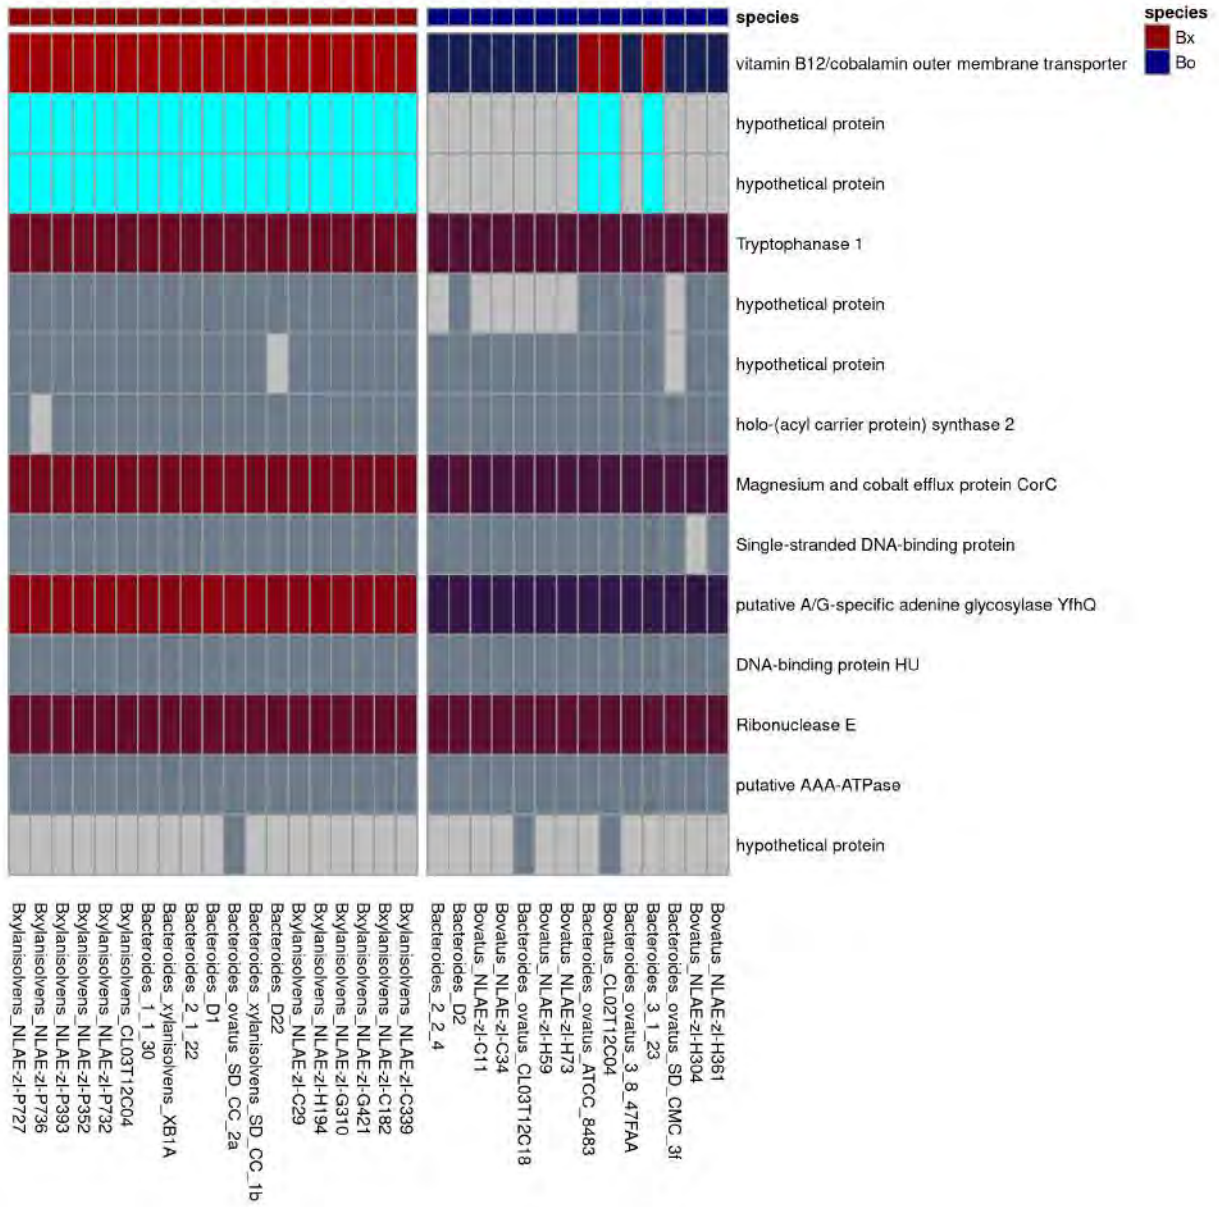

**B. ovatus non-PUL LGT Event 8**

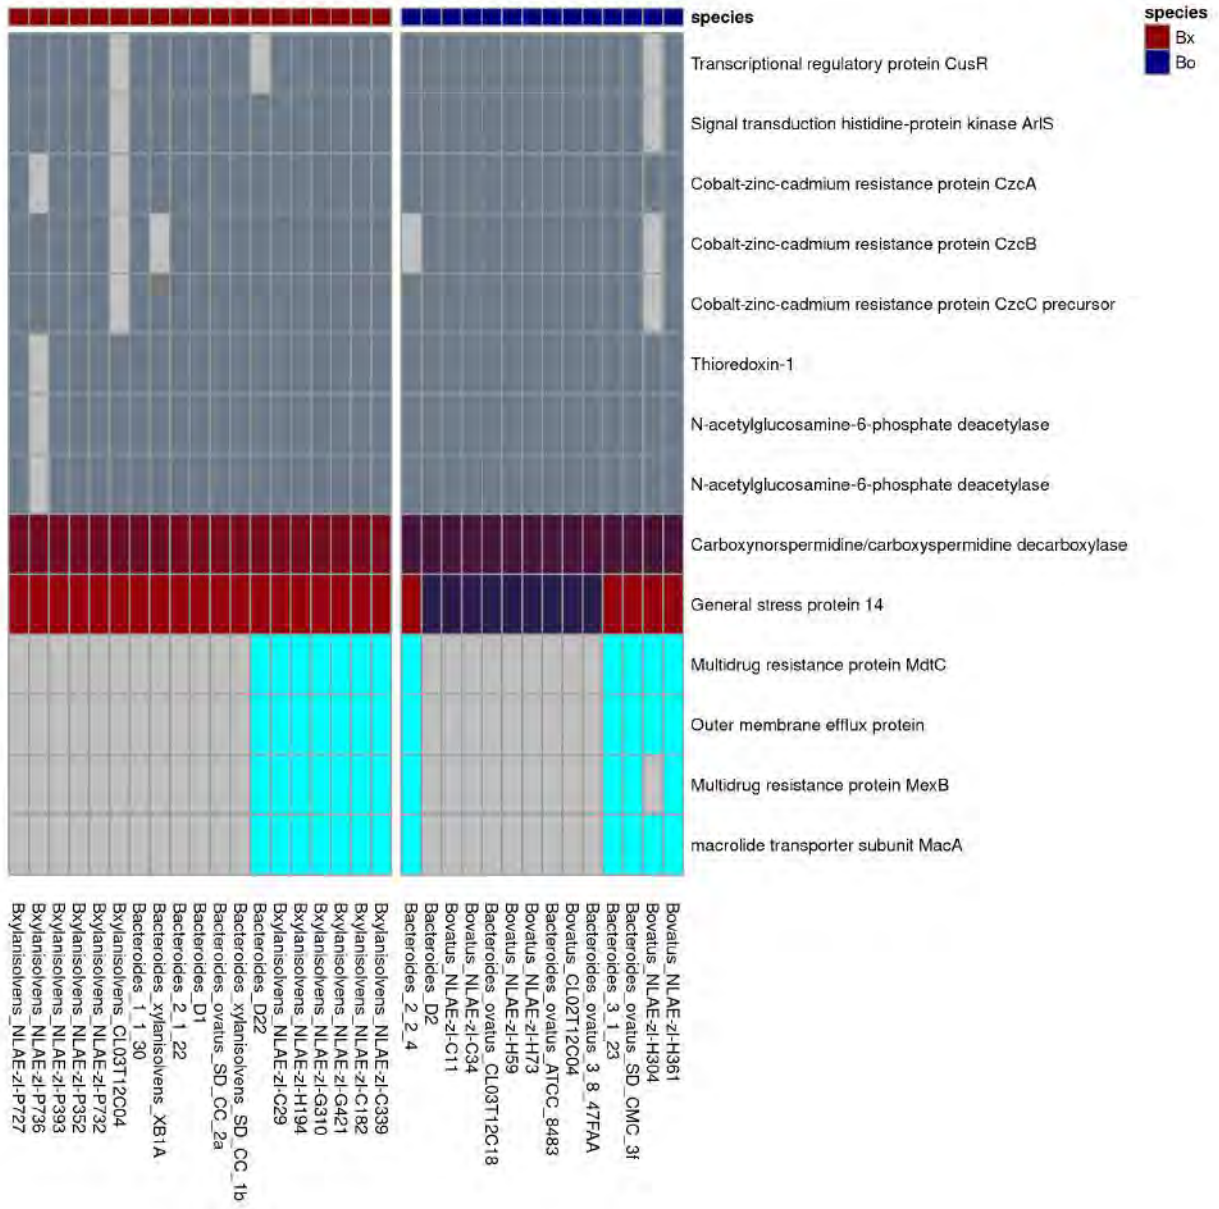

**B. ovatus non-PUL LGT Event 9**

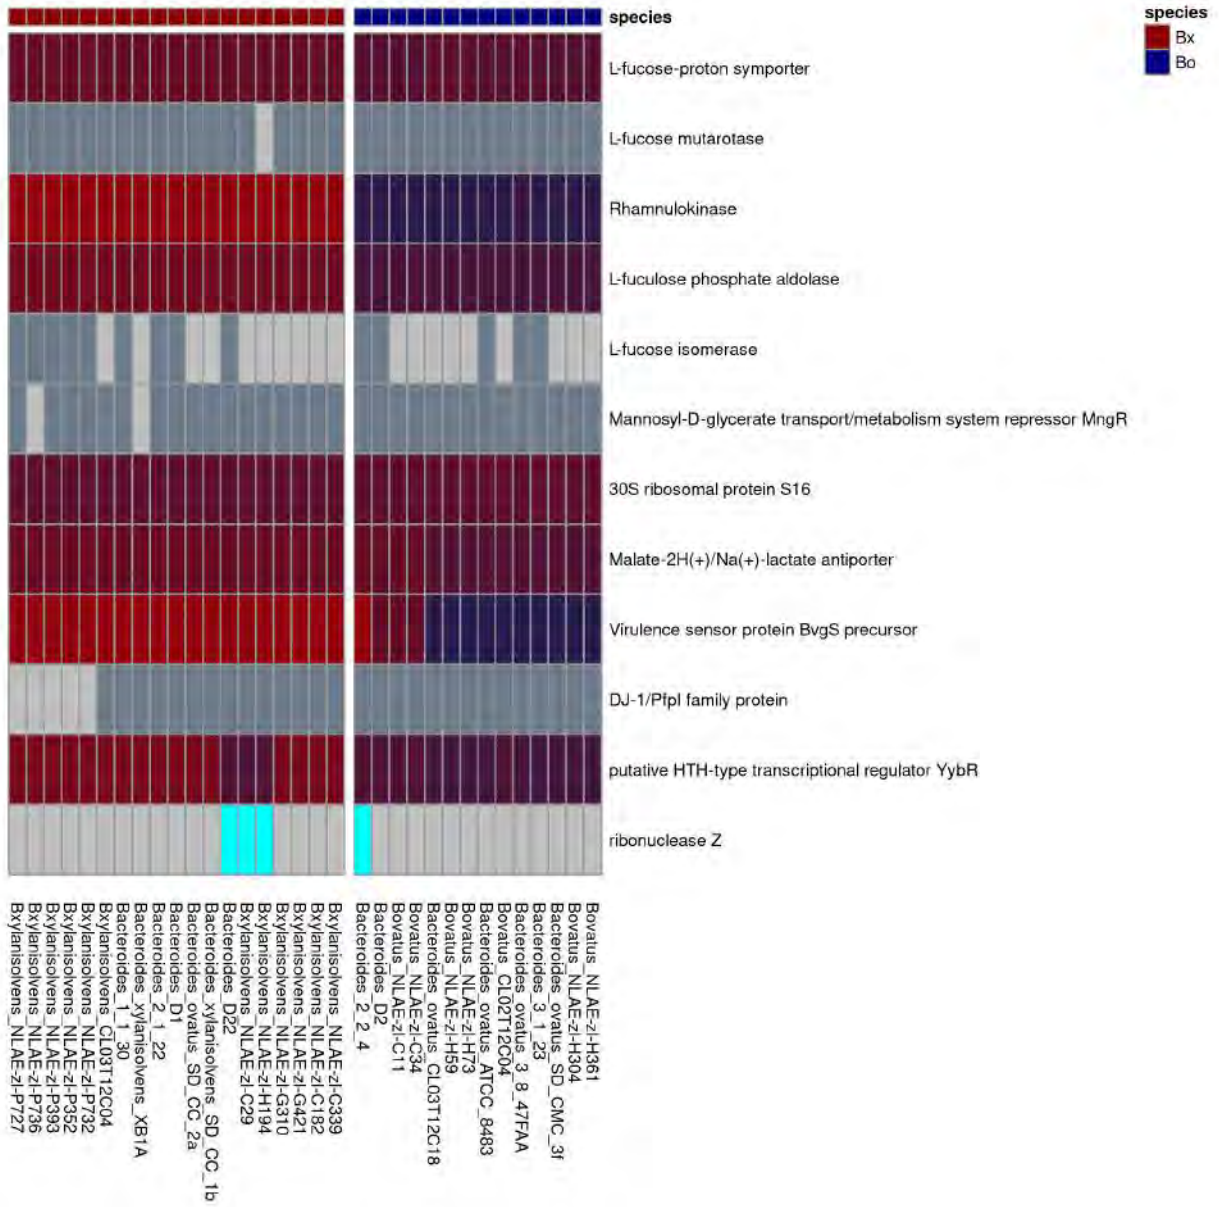



**B. xylanisolvens non-PUL LGT Event 1**

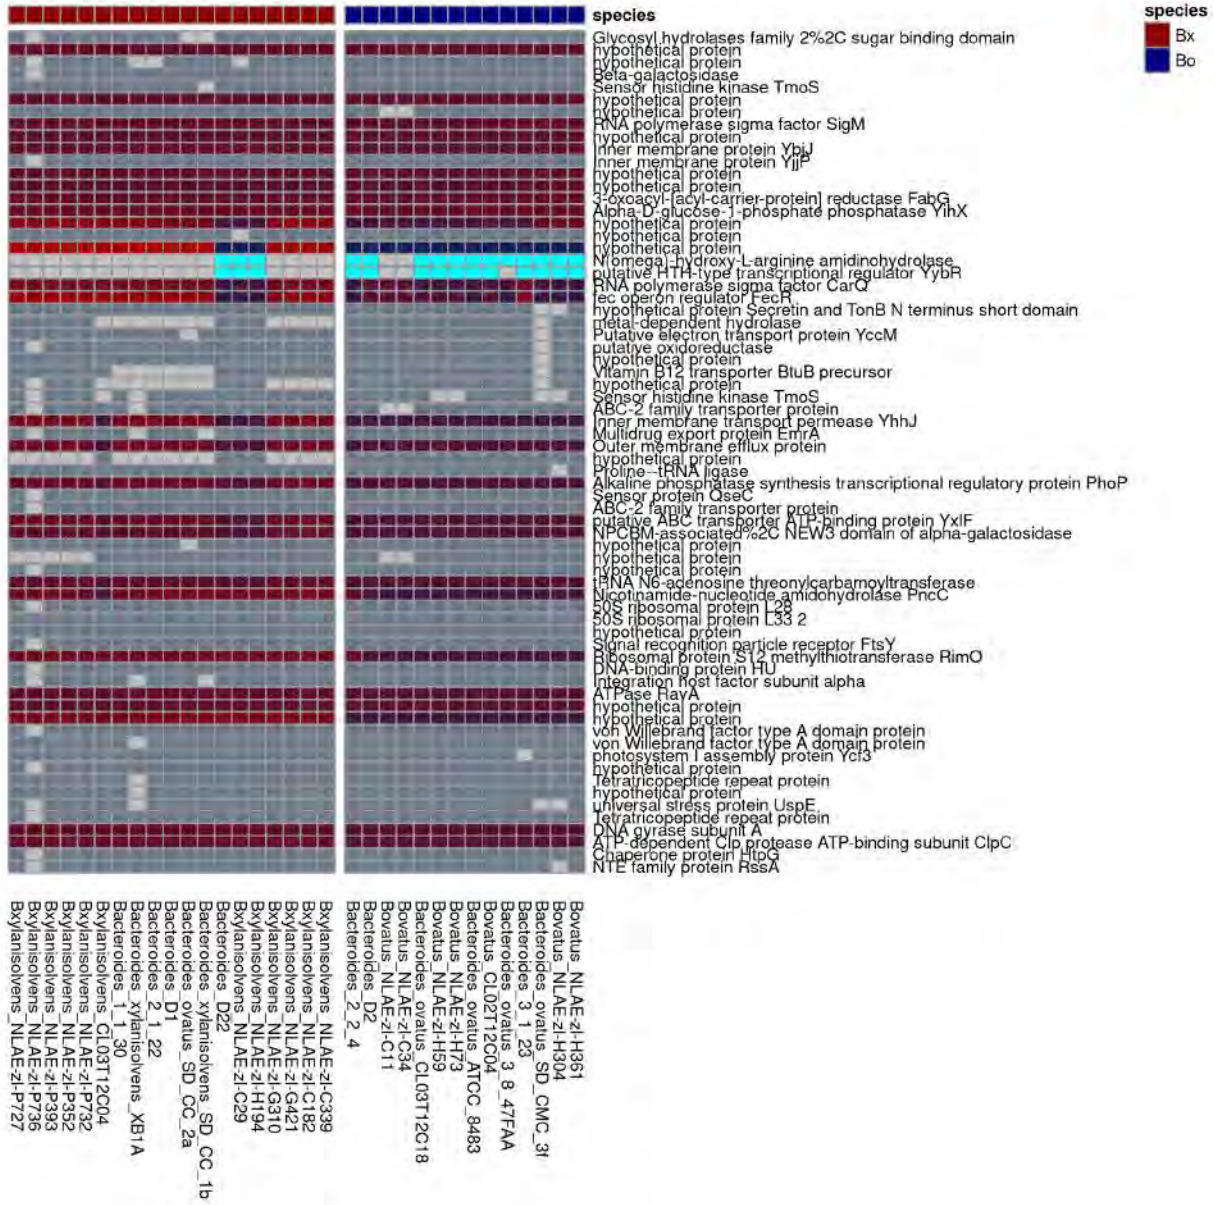

## B. xylanisolvans non-PUL LGT Event 2

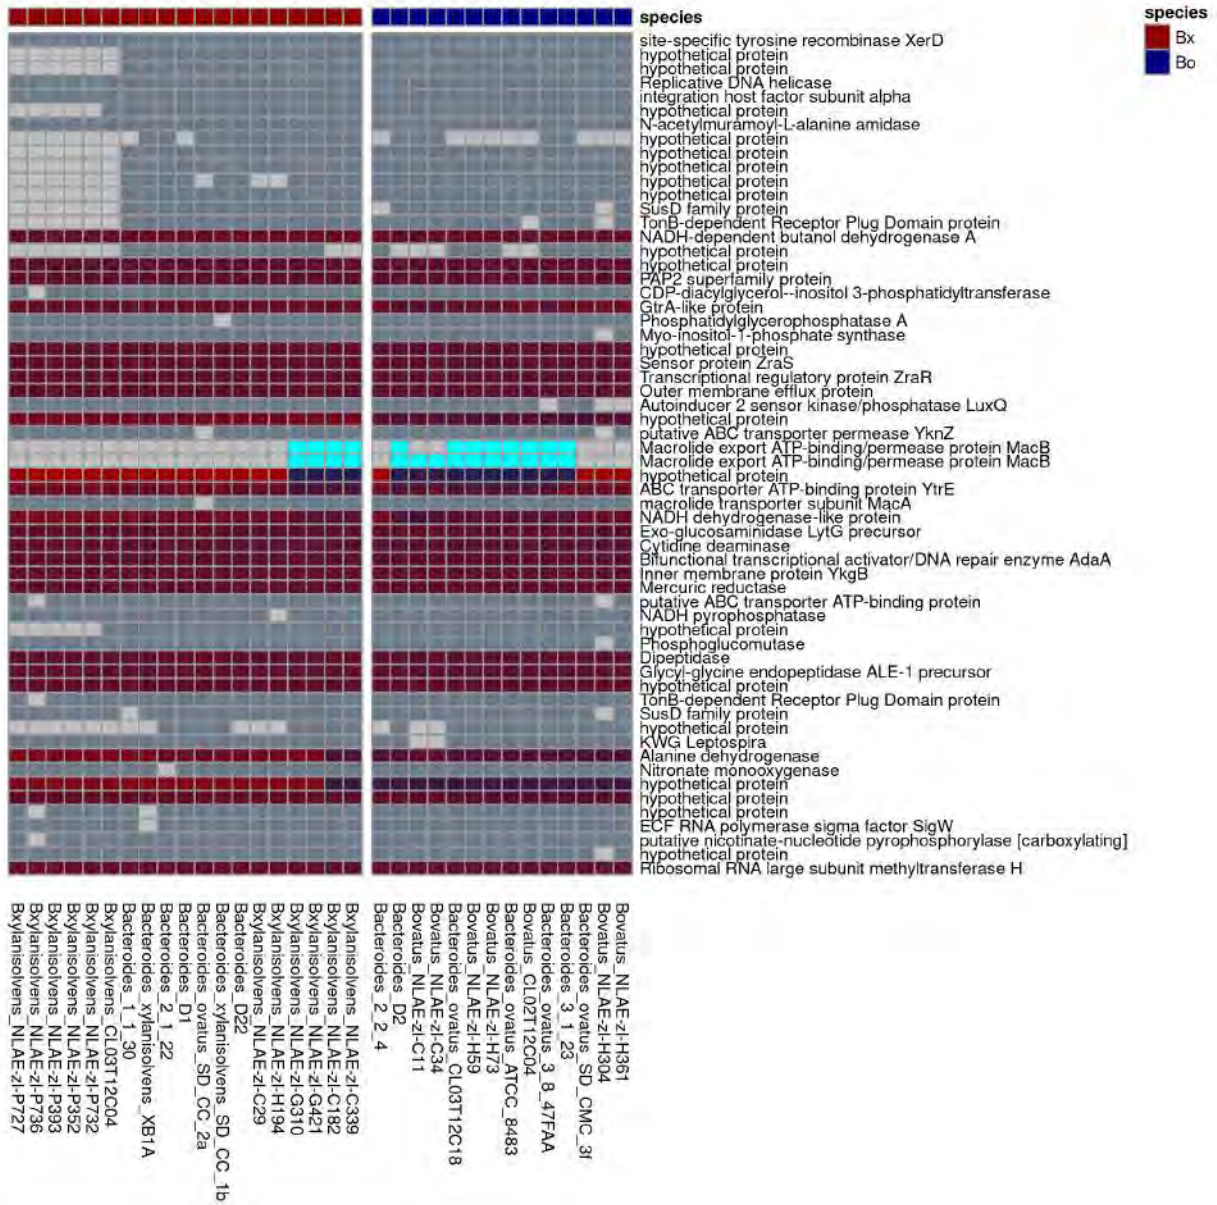



### B. xylanisolvans non-PUL LGT Event 3

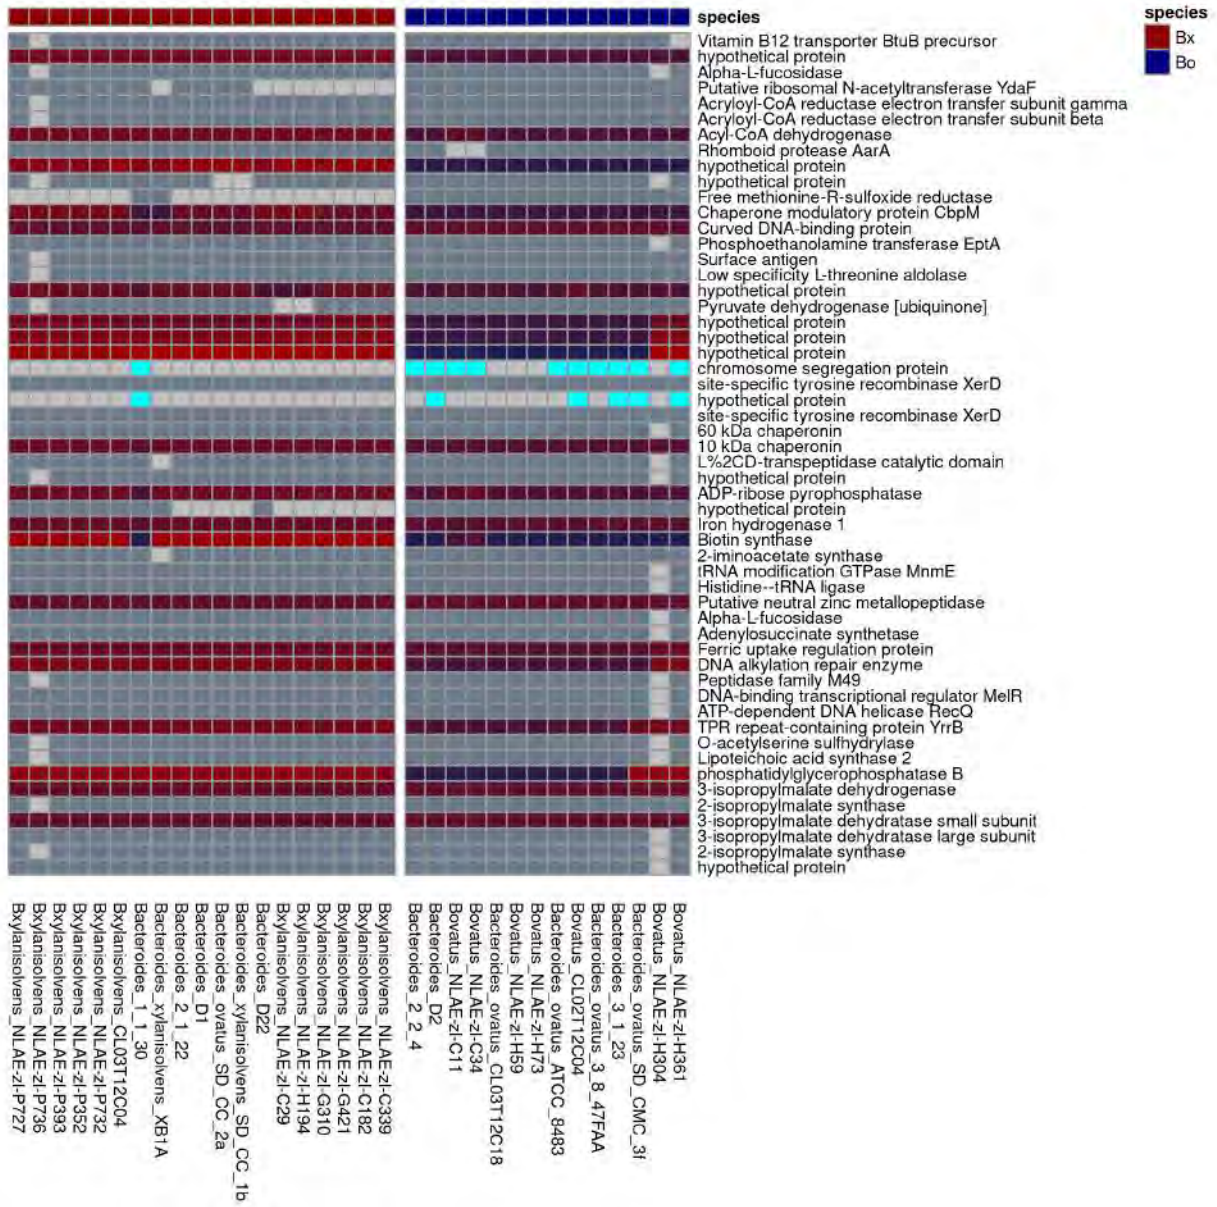



## B. xylanisolvans non-PUL LGT Event 4

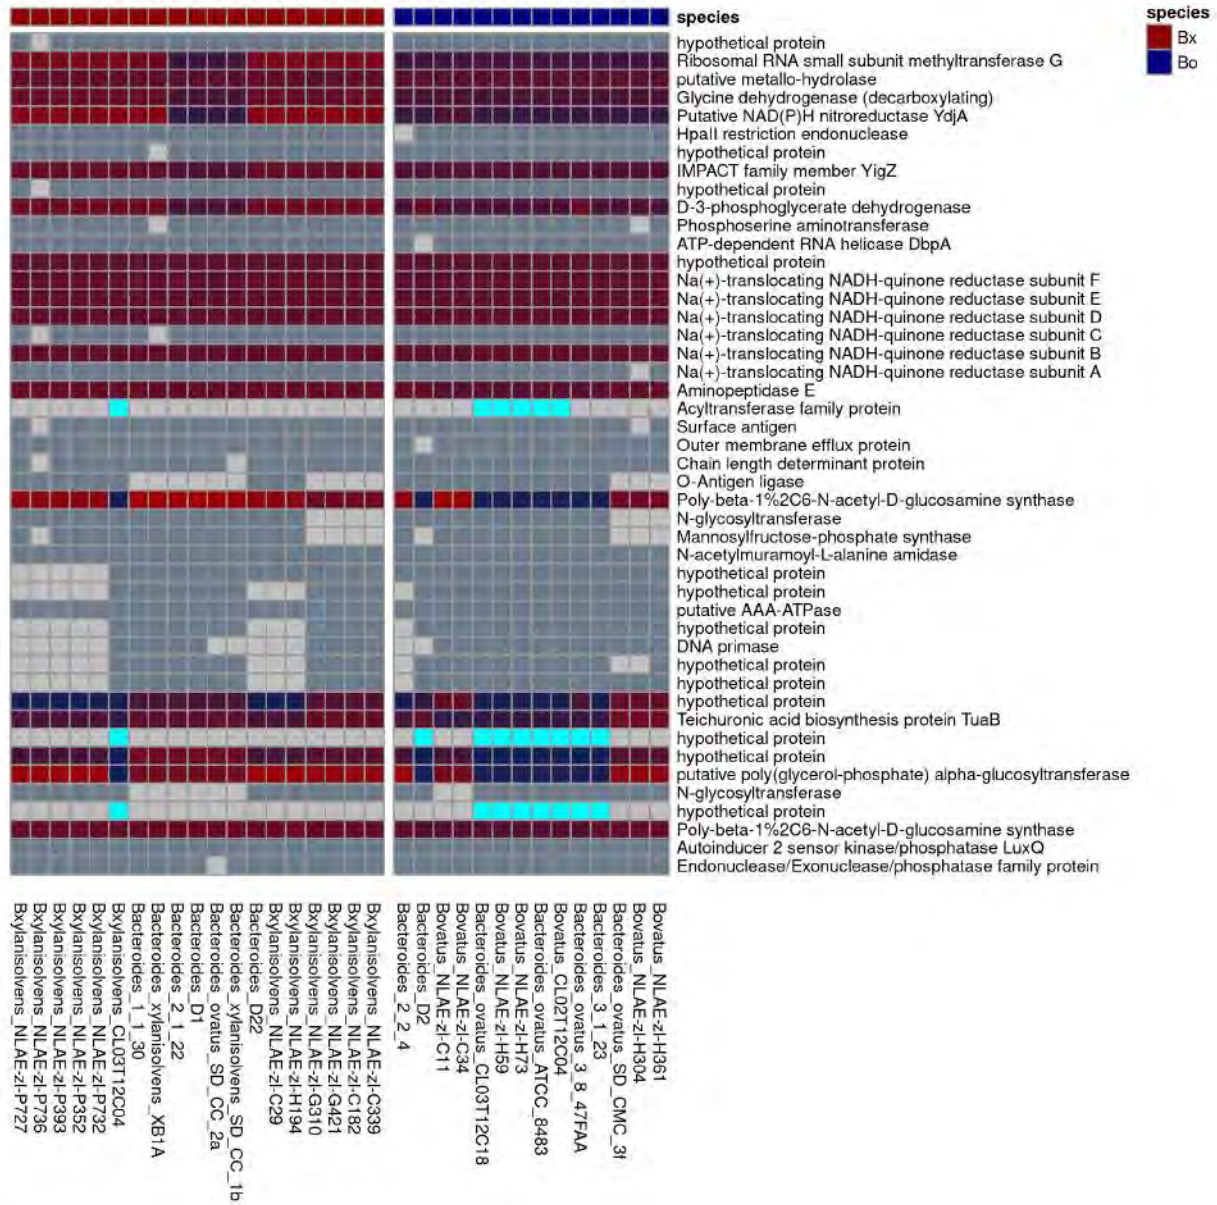

## B. xylanisolvans non-PUL LGT Event 5

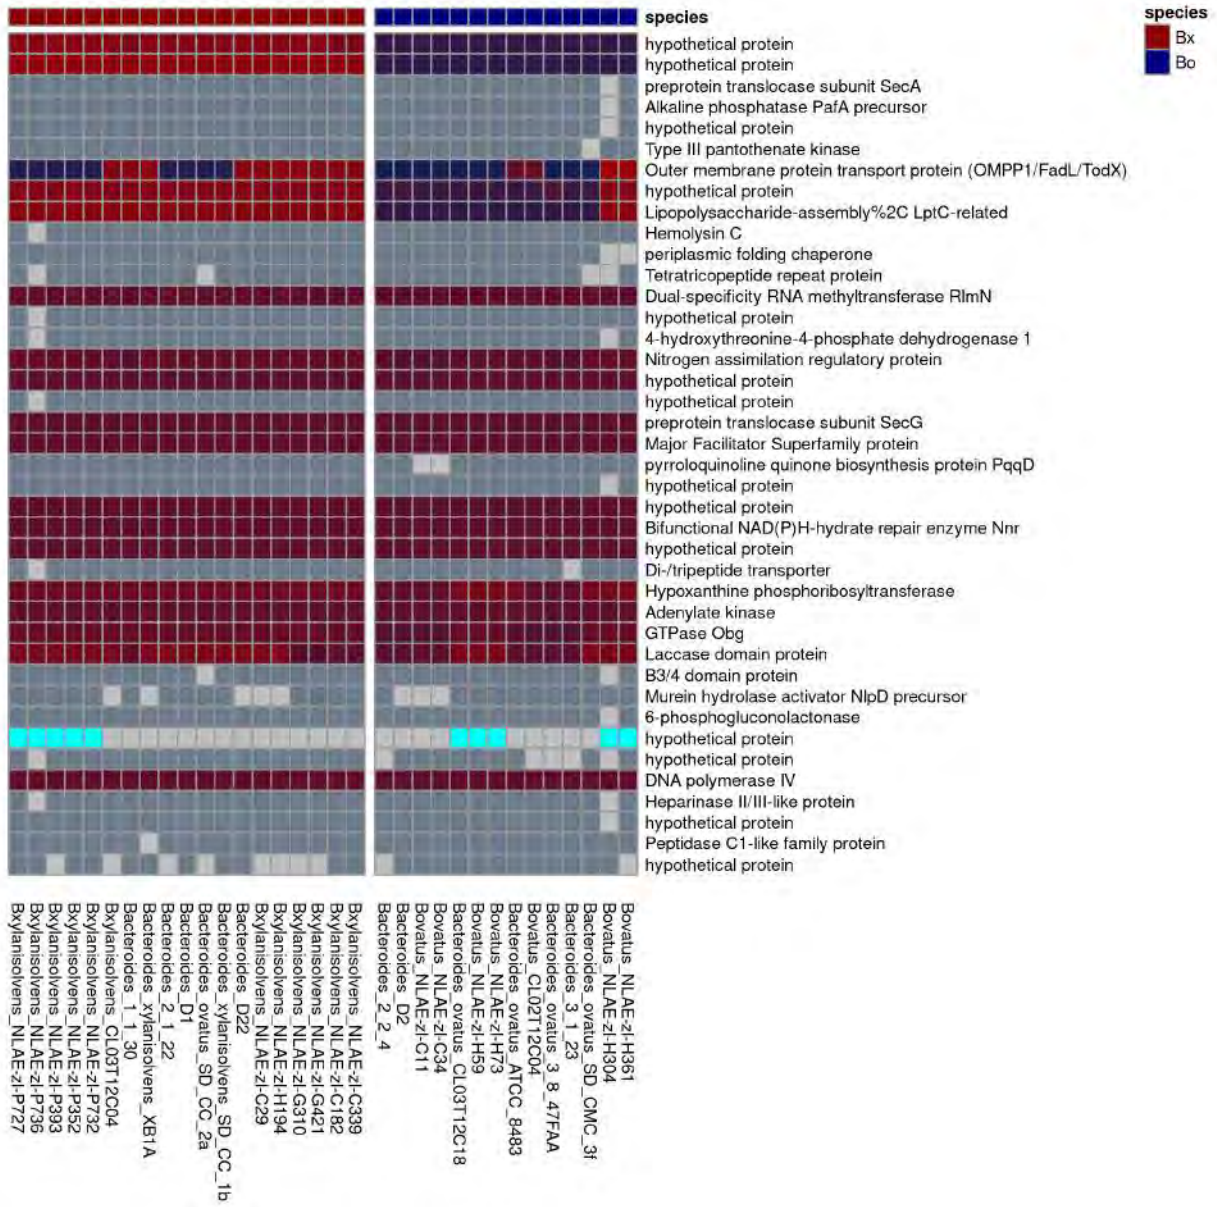



**B. xylanisolvans non-PUL LGT Event 6**

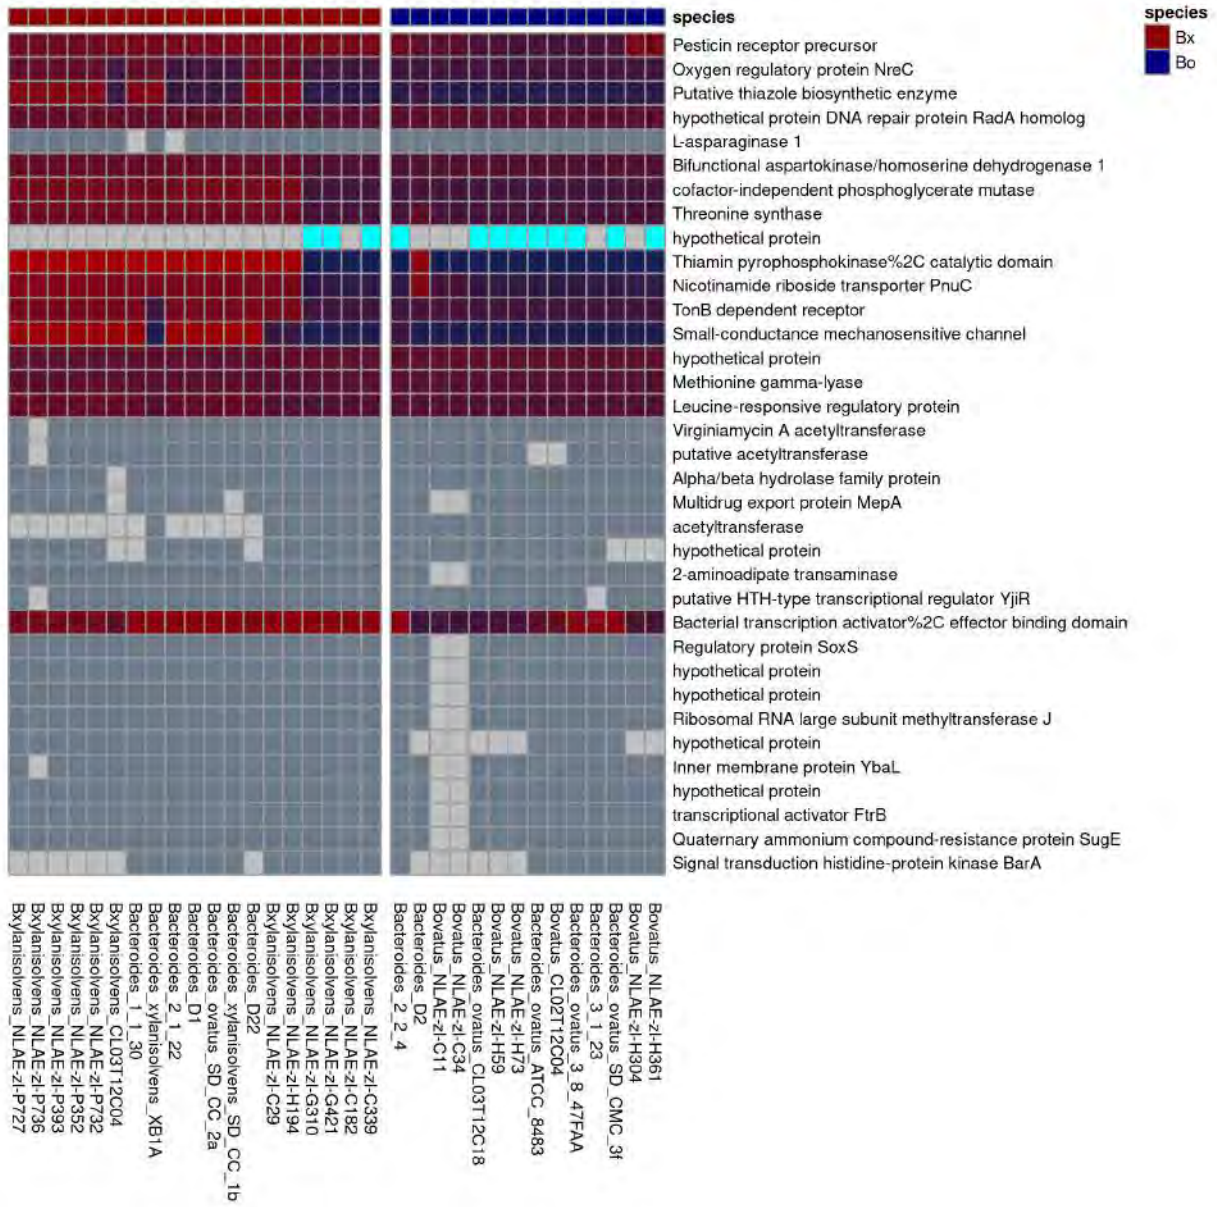



**B. xylanisolvans non-PUL LGT Event 7**

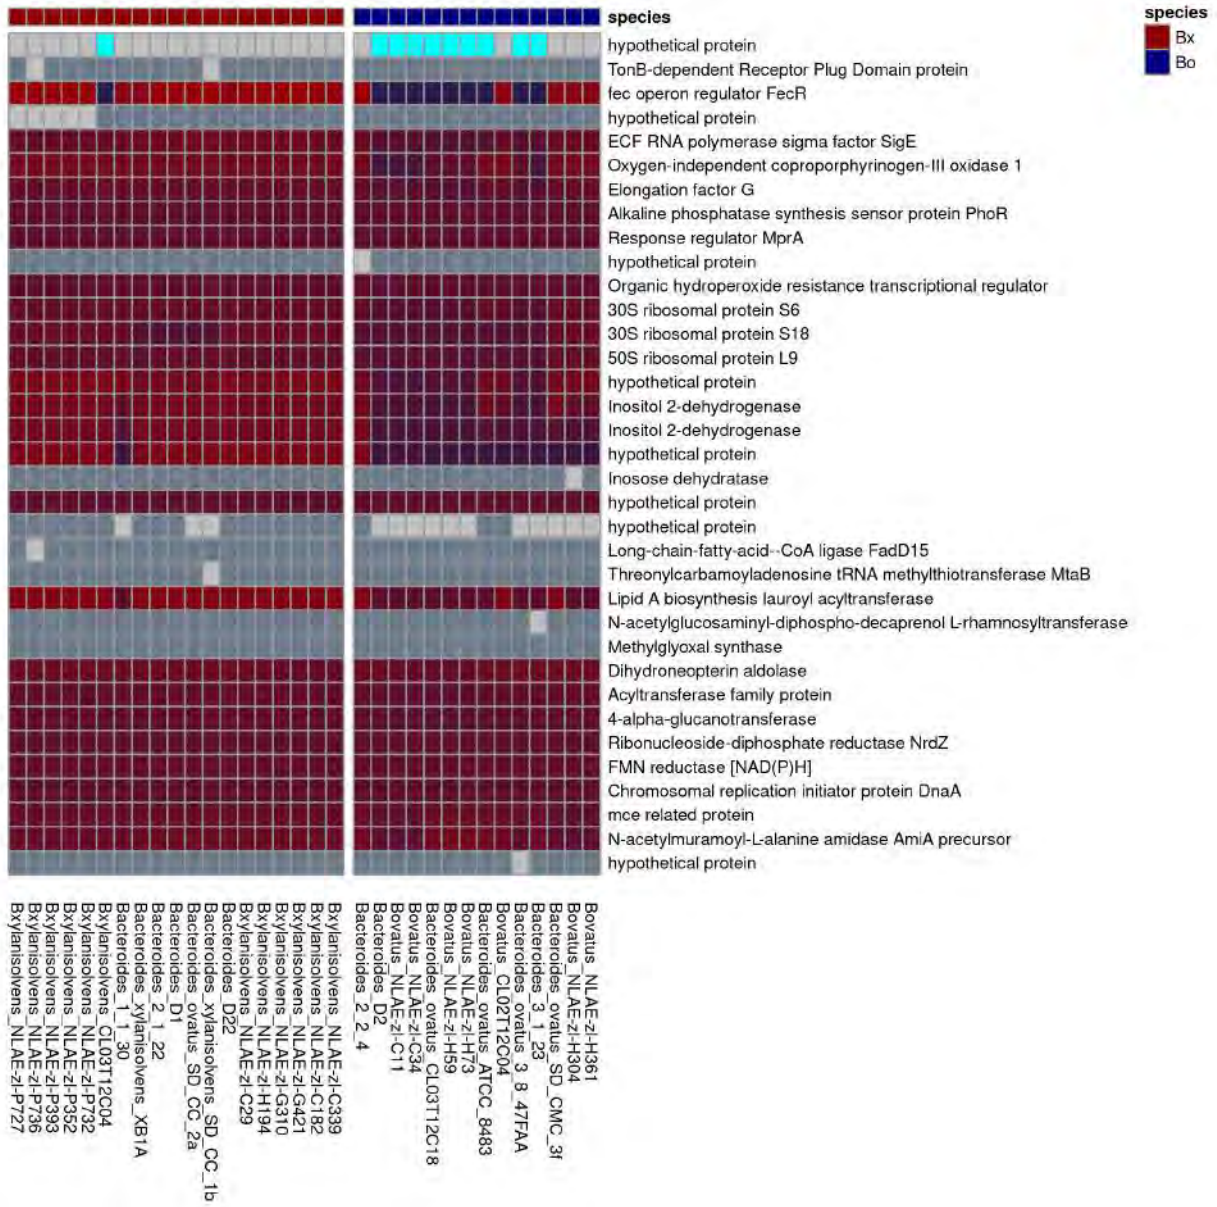

### B. xylanisolvans non-PUL LGT Event 8

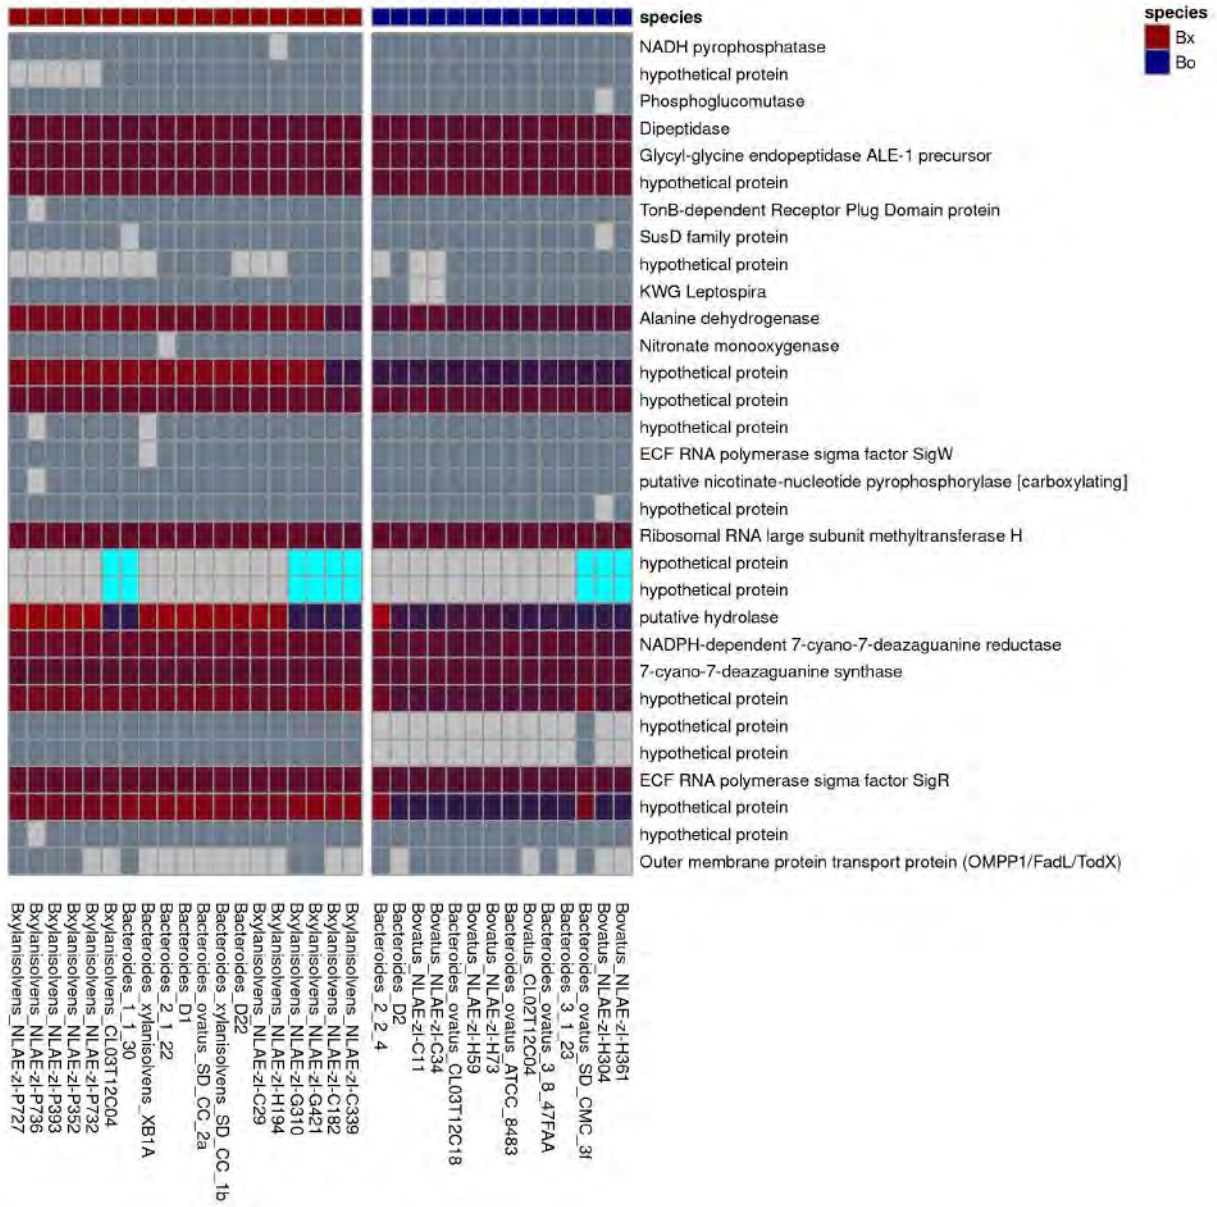



**B. xylanisolvans non-PUL LGT Event 9**

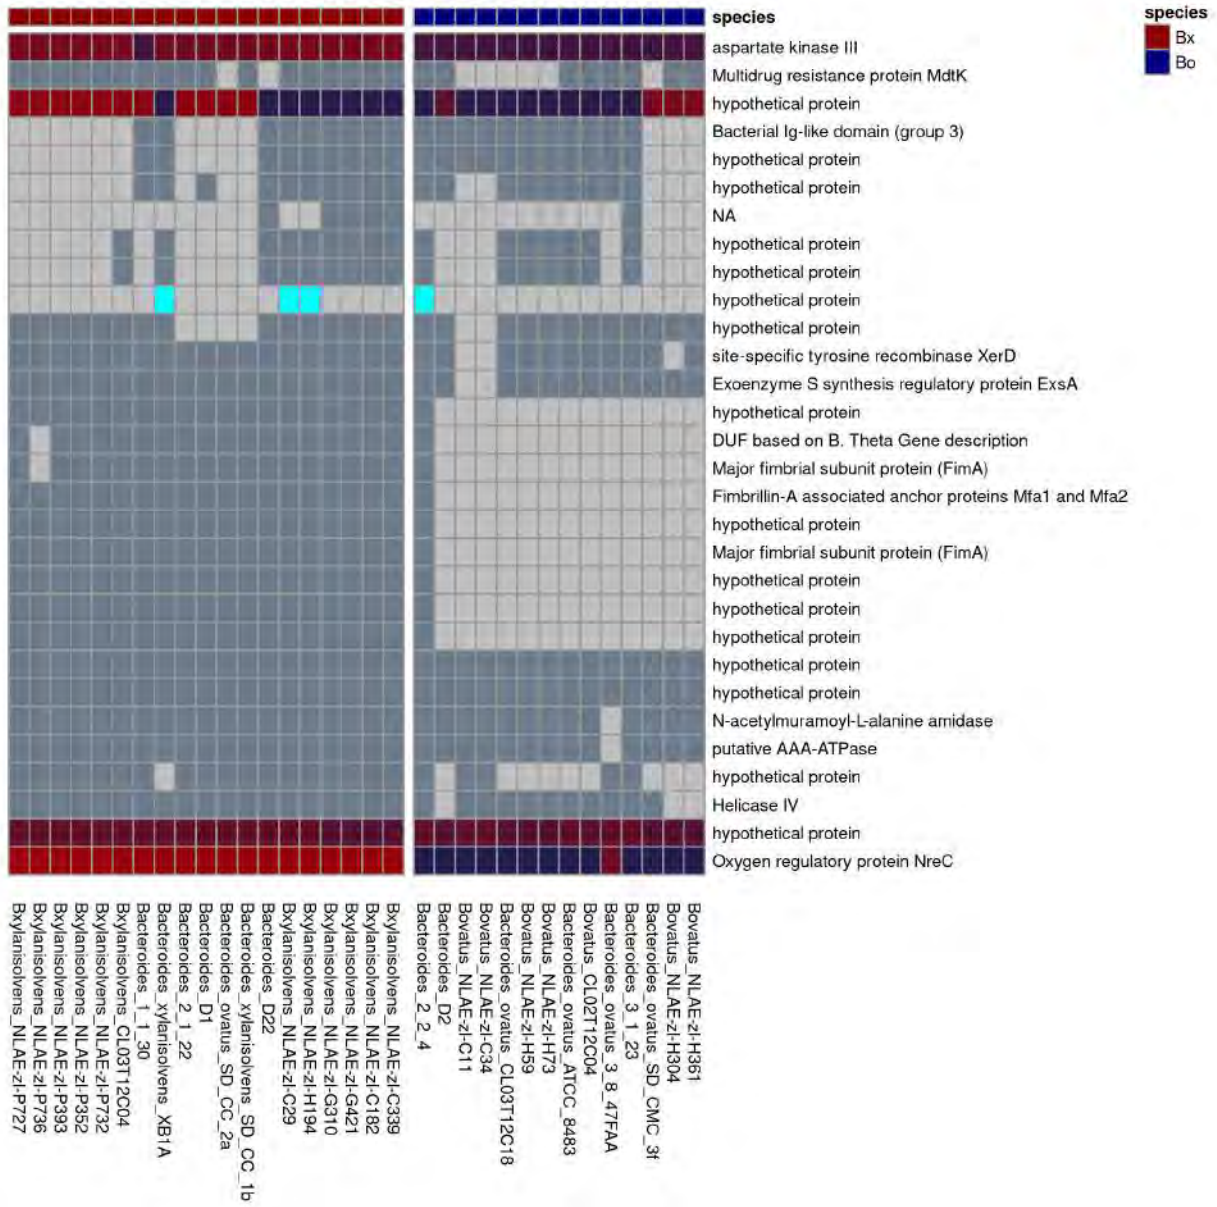



B. xylanisolvans non-PUL LGT Event 10

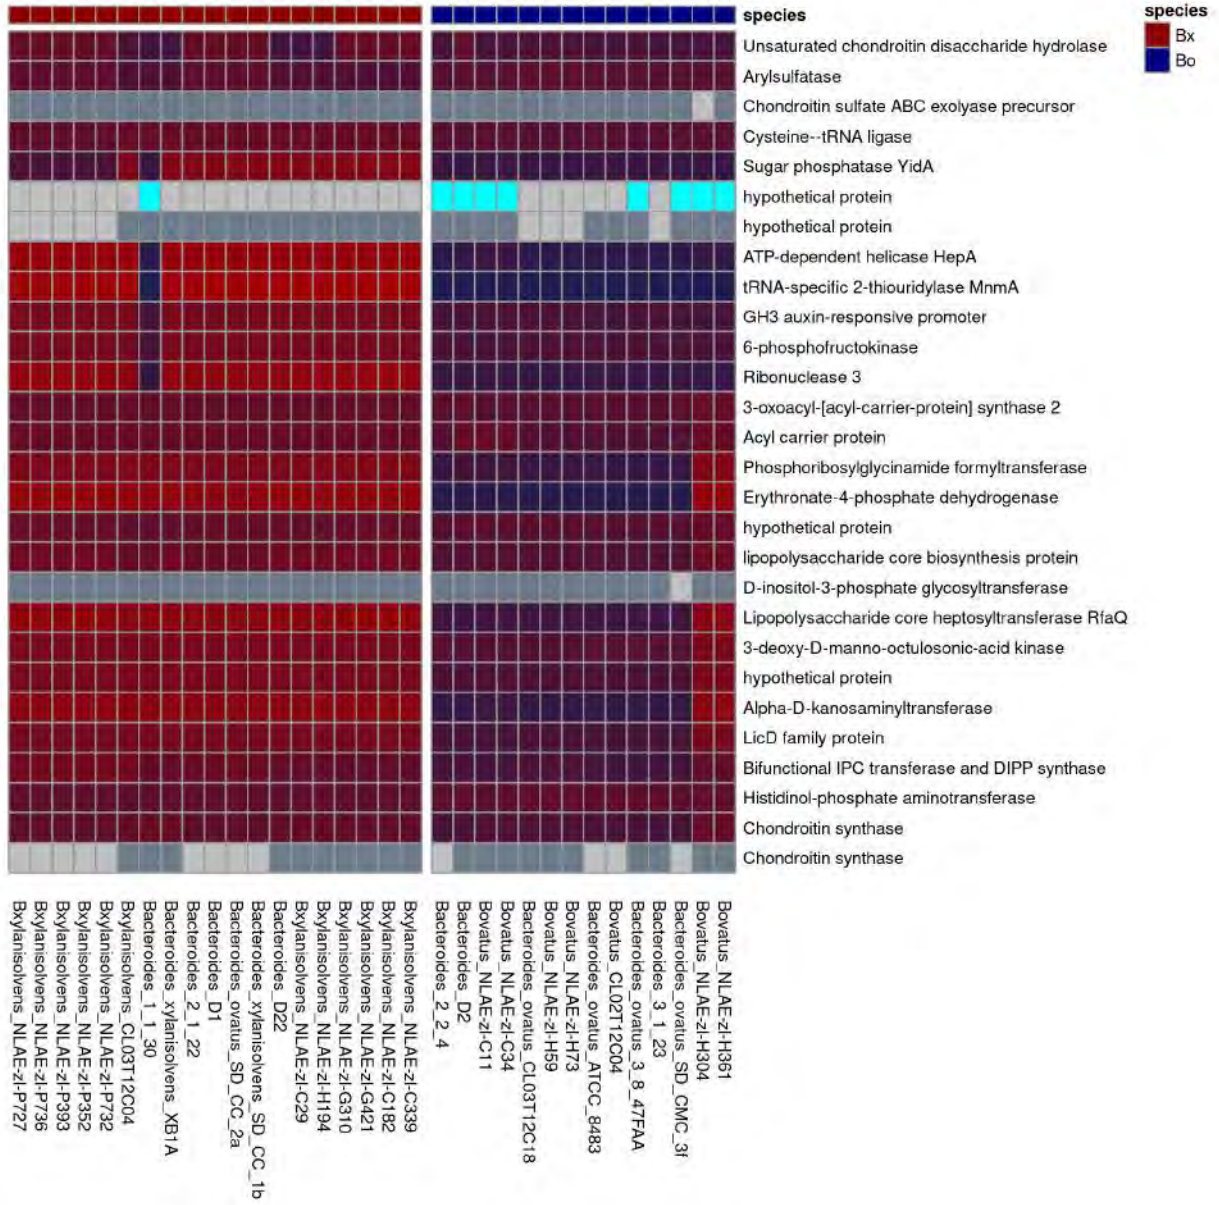

**B. xylanisolvans non-PUL LGT Event 11**

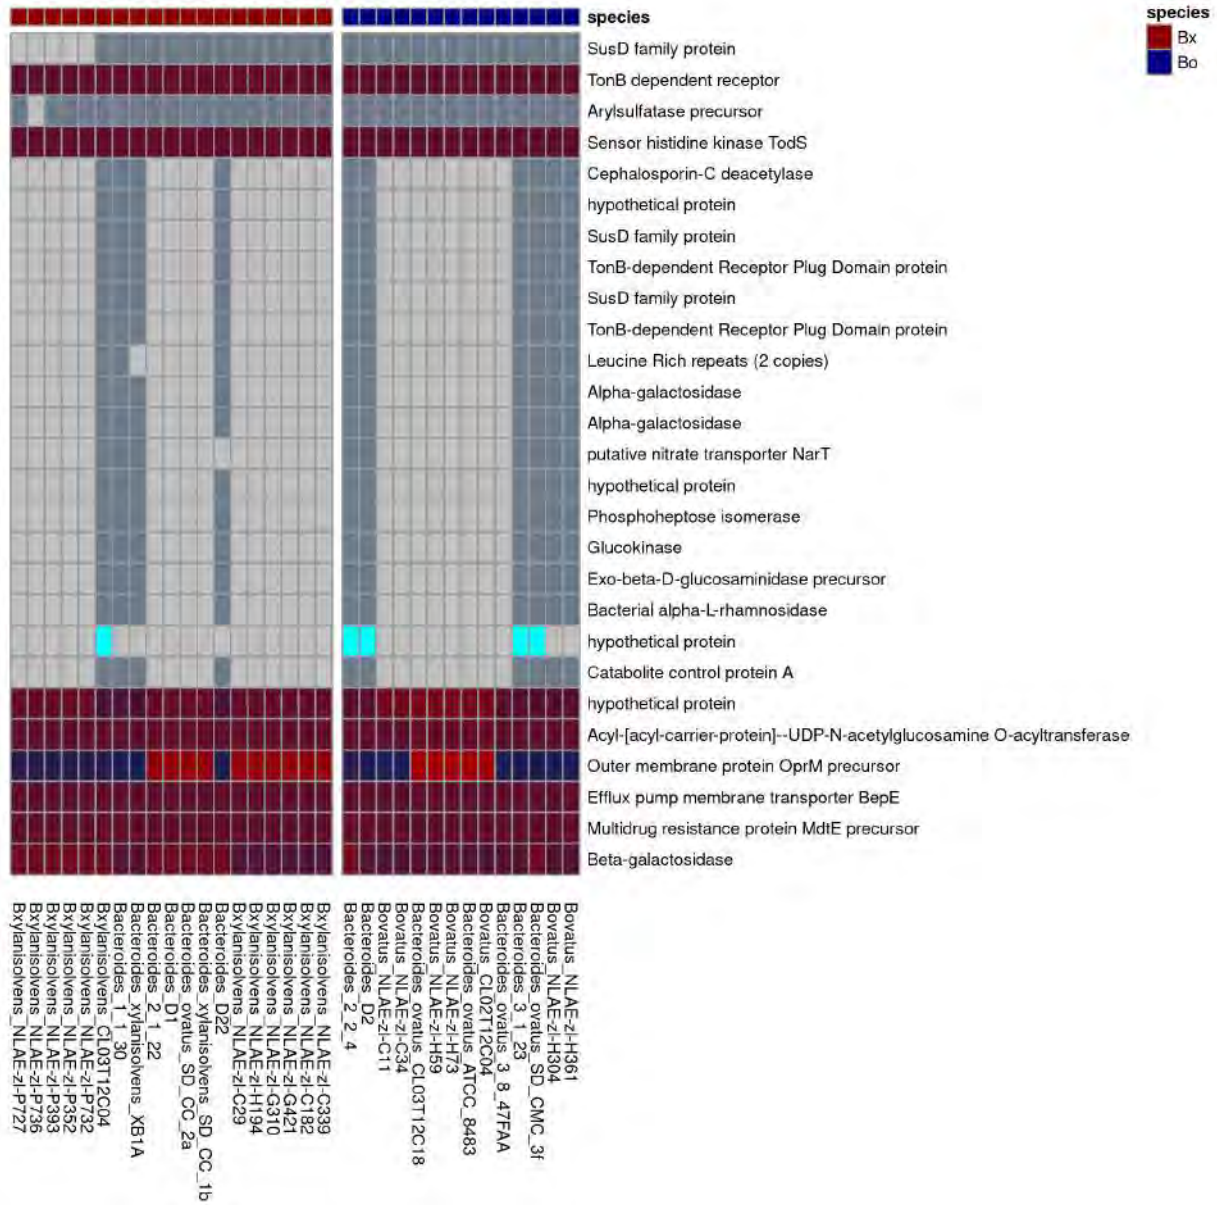





### B. xylanisolvans non-PUL LGT Event 13

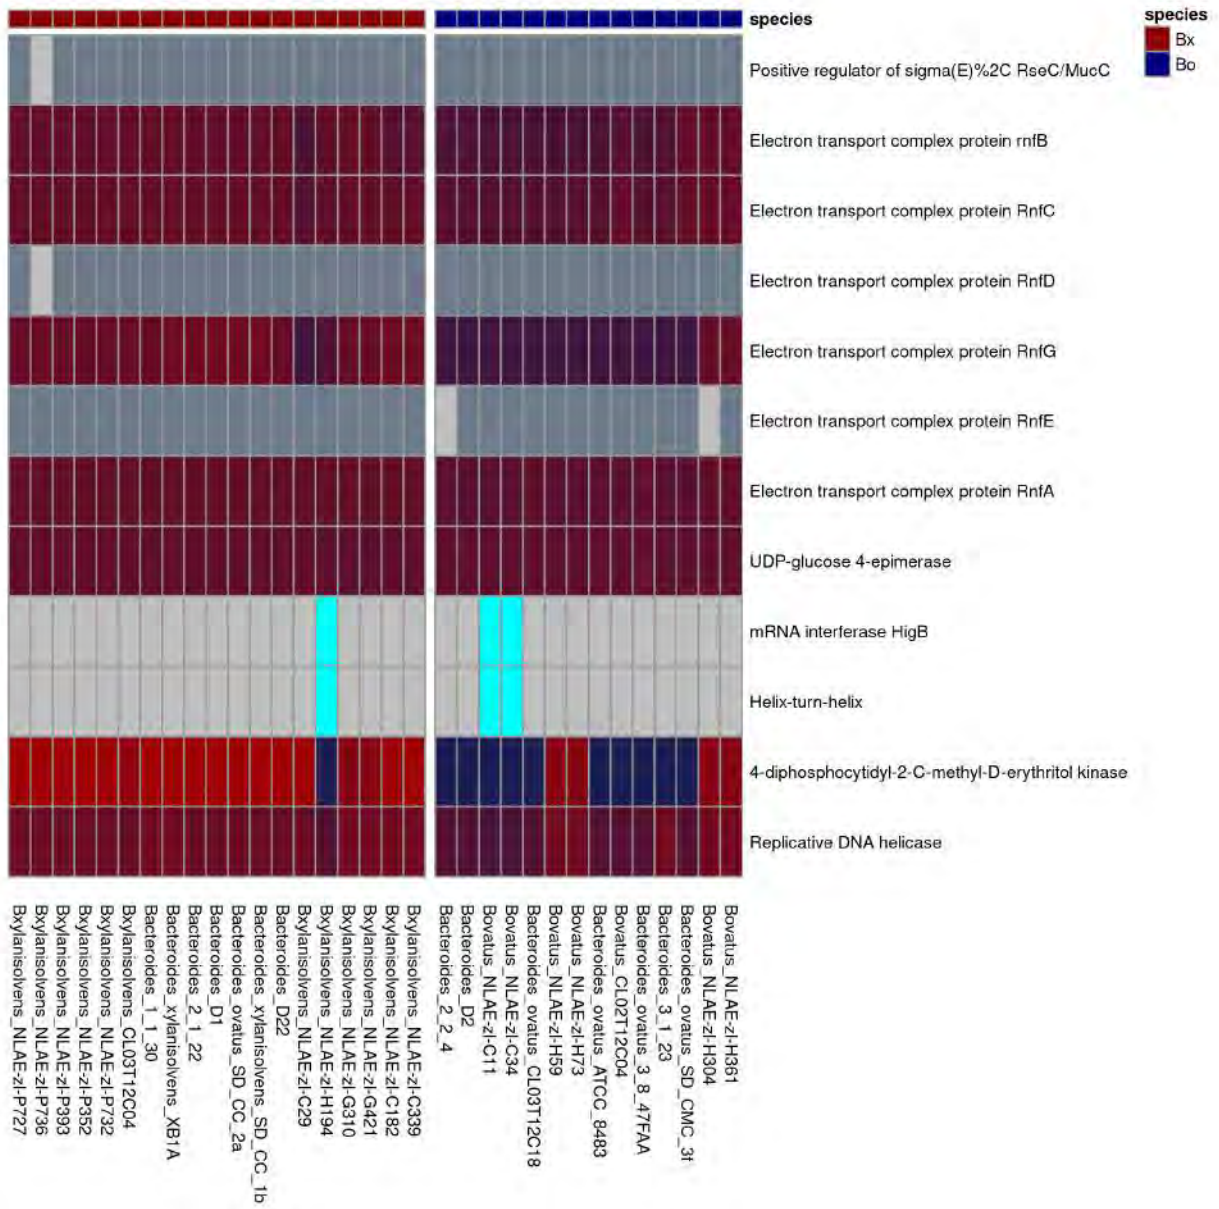

Supplement: msystems.00947-21-sf007.pdf [file msystems.00947-21-sf007.pdf]
