# Supplementary material for: Phenotypic and Genomic Diversification in Complex Carbohydrate-Degrading Human Gut Bacteria
Source: mSystems. 2022 Feb 15;7(1):e00947-21. doi: 10.1128/msystems.00947-21 (PMC8845570; doi:10.1128/msystems.00947-21)
Supplement: FIG S4 [file msystems.00947-21-sf004.pdf]

Figure S4

A. Example of Cluster scoring scheme

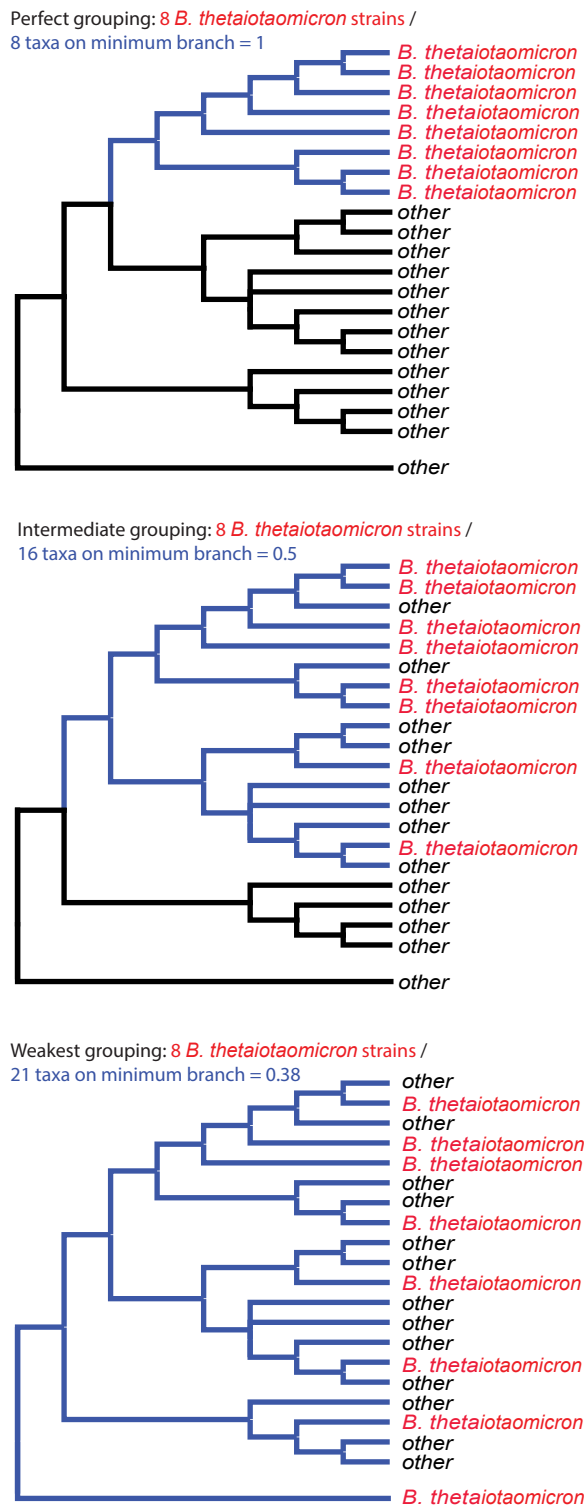

B. Normalized data

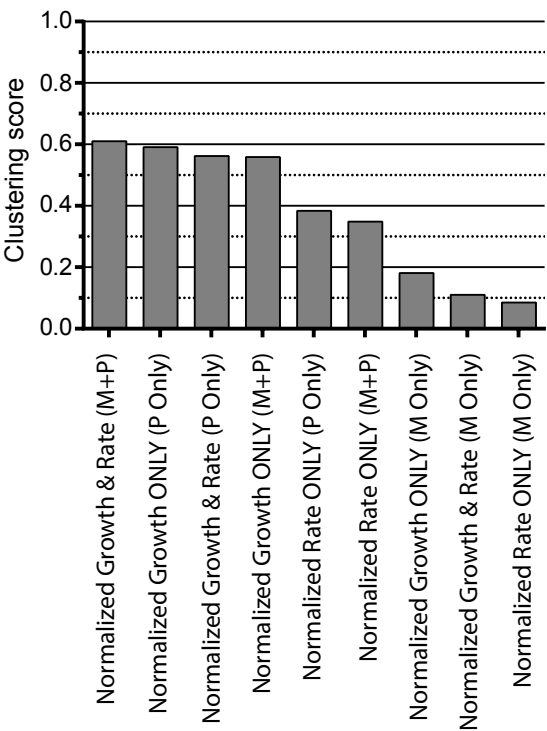

C. Unnormalized (raw) or binary (growth/no growth) data

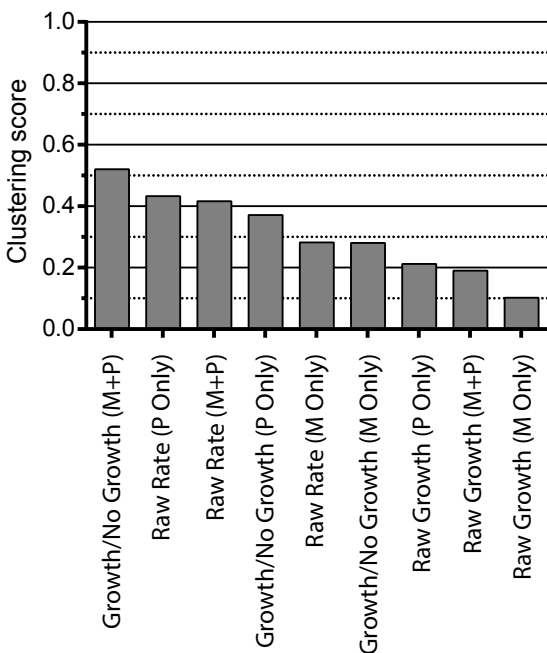

P= polysaccharide data  
M = monosaccharide data
