# Supplementary material for: Phenotypic and Genomic Diversification in Complex Carbohydrate-Degrading Human Gut Bacteria
Source: PubMed Central journal article supplement (PMC8845570; doi:10.1128/msystems.00947-21), 2022-02-15
Supplement: msystems.00947-21-sf002.pdf [file msystems.00947-21-sf002.pdf]

Figure S2

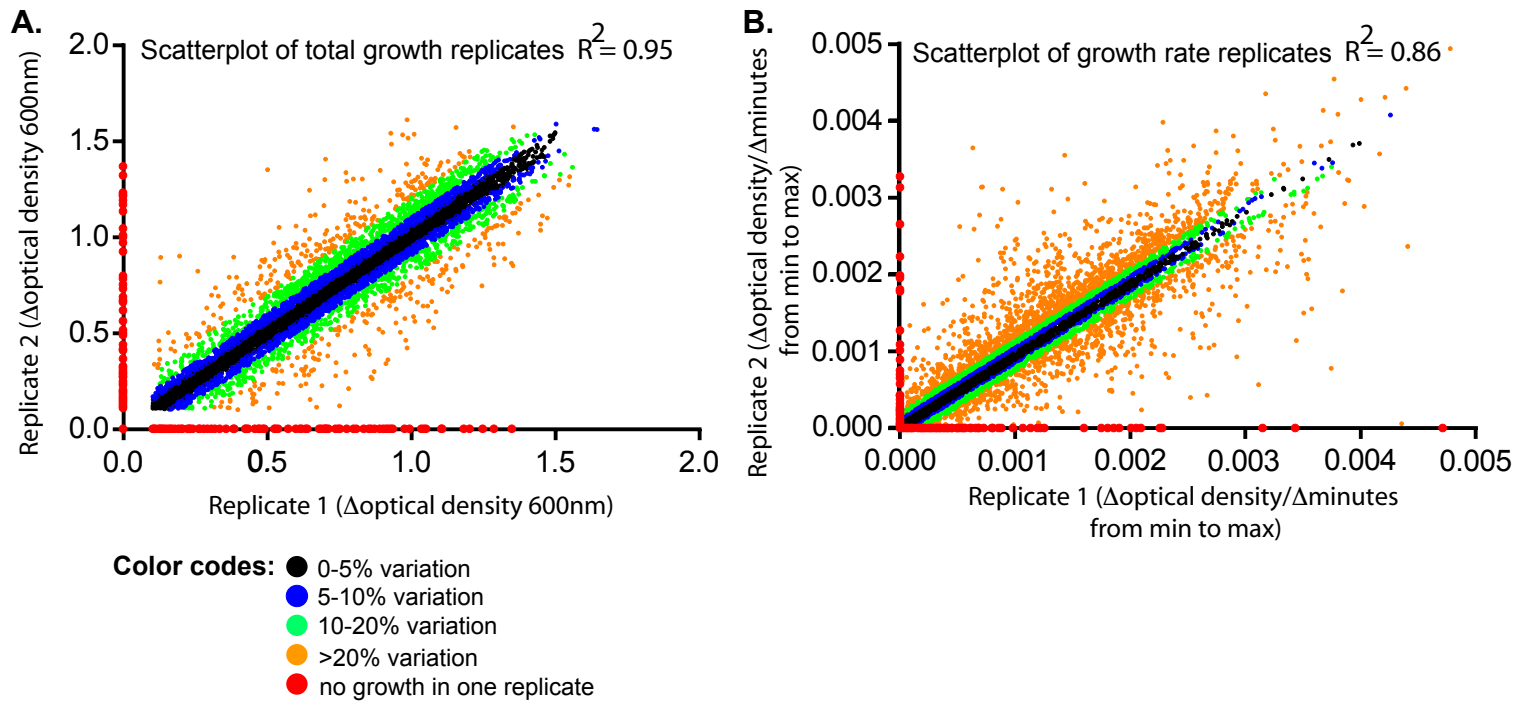

**C.**

**Polysaccharides:**

| Substrate      | $R^2$ between growth values | $R^2$ between rate values |
|----------------|-----------------------------|---------------------------|
| AG             | 0.99                        | 0.89                      |
| alg            | 0.96                        | 0.96                      |
| $\alpha$ -mann | 0.93                        | 0.76                      |
| APm            | 0.94                        | 0.92                      |
| APpo           | 0.96                        | 0.91                      |
| arab           | 0.98                        | 0.96                      |
| BBG            | 0.95                        | 0.70                      |
| carr           | 0.93                        | 0.96                      |
| Cell           | 0.96                        | 0.81                      |
| CS             | 0.96                        | 0.91                      |
| dex            | 0.96                        | 0.87                      |
| GalM           | 0.96                        | 0.98                      |
| GlcM           | 0.93                        | 0.85                      |
| glyc           | 0.96                        | 0.94                      |
| hep            | 0.96                        | 0.85                      |
| hya            | 0.91                        | 0.88                      |
| inulin         | 0.92                        | 0.89                      |
| lam            | 0.96                        | 0.96                      |
| levan          | 0.96                        | 0.88                      |
| lich           | 0.80                        | 0.45                      |
| MOG            | 0.98                        | 0.97                      |
| OSX            | 0.93                        | 0.83                      |
| PGA            | 0.97                        | 0.89                      |
| PGI            | 0.95                        | 0.96                      |
| PGp            | 0.92                        | 0.92                      |
| por            | 0.85                        | 0.85                      |
| pull           | 0.84                        | 0.78                      |
| RGI            | 0.96                        | 0.98                      |
| WAX            | 0.97                        | 0.42                      |
| XyG            | 0.92                        | 0.72                      |

**Monosaccharides:**

| Substrate | $R^2$ between growth values |
|-----------|-----------------------------|
| Ara       | 0.90                        |
| Fru       | 0.90                        |
| Fuc       | 0.93                        |
| Gal       | 0.60                        |
| GalA      | 0.86                        |
| GalNAc    | 0.93                        |
| Glc       | 0.69                        |
| GlcA      | 0.87                        |
| GlcNAc    | 0.72                        |
| GlcNH3    | 0.93                        |
| Man       | 0.88                        |
| NeuNAc    | 0.86                        |
| Rha       | 0.96                        |
| Rib       | 0.94                        |
| Xyl       | 0.85                        |
