# Supplementary material for: Phenotypic and Genomic Diversification in Complex Carbohydrate-Degrading Human Gut Bacteria
Source: PubMed Central journal article supplement (PMC8845570; doi:10.1128/msystems.00947-21), 2022-02-15

Figure S3

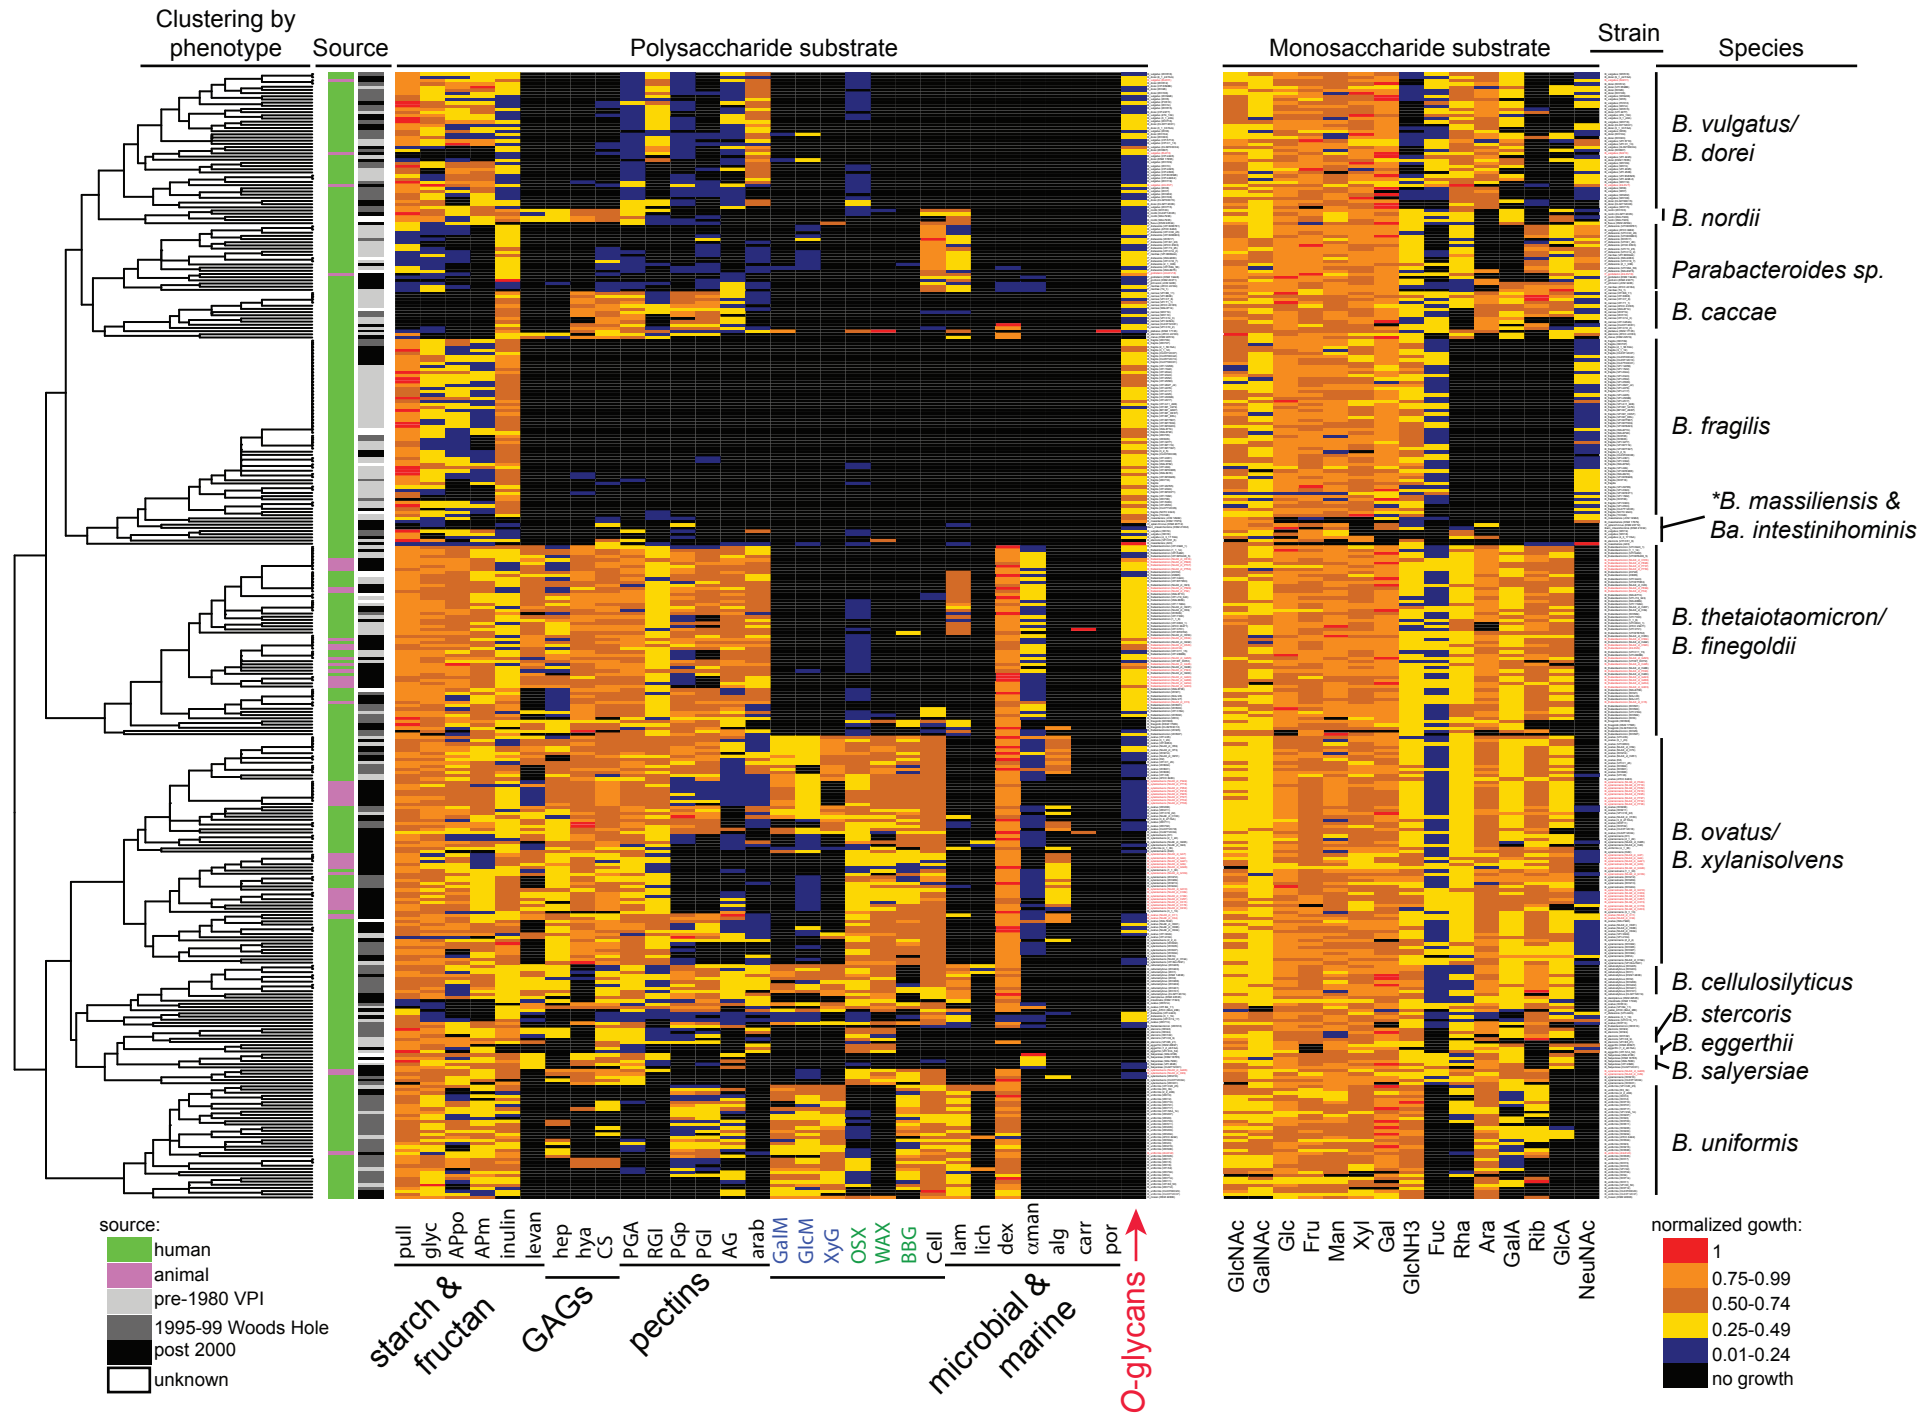

Supplement: msystems.00947-21-sf003.pdf [file msystems.00947-21-sf003.pdf]
